1  
2  
3 **Receptor-mediated Drp1 oligomerization on endoplasmic reticulum**  
4  
5

6 Wei-Ke Ji<sup>1,3</sup>, Rajarshi Chakrabarti<sup>1</sup>, Xintao Fan<sup>1</sup>, Lori Schoenfeld<sup>1</sup>, Stefan Strack<sup>2</sup> & Henry N.  
7 Higgs<sup>1\*</sup>  
8  
9

10 <sup>1</sup>Department of Biochemistry and Cell Biology, Geisel School of Medicine at Dartmouth, Hanover NH  
11 03755  
12

13 <sup>2</sup>Department of Pharmacology, Carver School of Medicine, University of Iowa, Iowa City IA 52246  
14

15 <sup>3</sup>Department of Biochemistry and Molecular Biology, School of Basic Medicine and the Collaborative  
16 Innovation Center for Brain Science, Tongji Medical College, Huazhong University of Science and  
17 Technology, Wuhan, China.  
18

19 \*Corresponding author. E-mail: [henry.higgs@dartmouth.edu](mailto:henry.higgs@dartmouth.edu)  
20

21 Running title: ER-bound mitochondrial division proteins  
22

23 **Summary**

24 Assembly of the dynamin GTPase Drp1 into constriction-competent oligomers is a key event in  
25 mitochondrial division. Here, Ji *et al* show that Drp1 oligomerization can occur on endoplasmic  
26 reticulum through an ER-bound population of the tail-anchored protein Mff.  
27  
28

29 Abbreviations used in this paper: Drp1, dynamin-related protein 1; Fis1, mitochondrial fission 1  
30 protein; INF2, inverted formin 2; KD, siRNA-mediated knock down; KI, CRISPR-mediated knock in;  
31 KO, CRISPR-mediated knock out; LatA, Latrunculin A; MDV, mitochondrially-derived vesicle; Mff,  
32 mitochondrial fission factor; MiD49 and MiD51, mitochondrial dynamics protein of 49 and 51 kDa;  
33 OMM, outer mitochondrial membrane; TA, tail-anchored.

34 **Abstract**

35 Drp1 is a dynamin GTPase important for mitochondrial and peroxisomal division. Drp1 oligomerization  
36 and mitochondrial recruitment are regulated by multiple factors, including interaction with  
37 mitochondrial receptors such as Mff, MiD49, MiD51 and Fis. In addition, both endoplasmic reticulum  
38 (ER) and actin filaments play positive roles in mitochondrial division, but mechanisms for their roles are  
39 poorly defined. Here, we find that a population of Drp1 oligomers is ER-associated in mammalian cells,  
40 and is distinct from mitochondrial or peroxisomal Drp1 populations. Sub-populations of Mff and Fis1,  
41 which are tail-anchored proteins, also localize to ER. Drp1 oligomers assemble on ER, from which they  
42 can transfer to mitochondria. Suppression of Mff or inhibition of actin polymerization through the  
43 formin INF2 significantly reduces all Drp1 oligomer populations (mitochondrial, peroxisomal, ER-  
44 bound) and mitochondrial division, while Mff targeting to ER has a stimulatory effect on division. Our  
45 results suggest that ER can function as a platform for Drp1 oligomerization, and that ER-associated Drp1  
46 contributes to mitochondrial division.

47 **Introduction**

48 Mitochondrial division plays an important role in many cellular processes, facilitating  
49 appropriate mitochondrial nucleoid distribution (Lewis et al., 2016), allowing cells to respond  
50 to changing metabolic needs (Hatch et al., 2014; Labbe et al., 2014; Mishra and Chan, 2016;  
51 Pernas and Scorrano, 2016), and contributing to selective autophagy of damaged mitochondria  
52 (Youle and van der Bliek, 2012). Defects in mitochondrial division have been linked to multiple  
53 diseases (DuBoff et al., 2013; Nunnari and Suomalainen, 2012; Vafai and Mootha, 2012).

54  
55 A key component of mitochondrial division is the dynamin family GTPase Drp1. Drp1 is a  
56 cytosolic protein that is recruited to the outer mitochondrial membrane (OMM), where it  
57 oligomerizes into a spiral around the OMM (Bui and Shaw, 2013). GTP hydrolysis results in  
58 Drp1 spiral constriction, providing a driving force for mitochondrial division. Subsequent  
59 recruitment of a second dynamin GTPase, dynamin 2, appears necessary for complete  
60 membrane division (Lee et al., 2016).

61  
62 A number of features suggest that mitochondrial Drp1 recruitment is a multi-step and finely-  
63 tuned process in mammals. First, mitochondrial division occurs preferentially at contact sites  
64 with endoplasmic reticulum (ER), suggesting that ER contributes components and/or signaling  
65 information to the process (Friedman et al., 2011). Second, Drp1 recruitment to mitochondria  
66 is not an all-or-none phenomenon, but rather an equilibrium process in which Drp1 oligomers  
67 dynamically assemble on mitochondria independently of signals for mitochondrial division (Ji  
68 et al., 2015). A variety of division signals may push Drp1's on-going equilibrium toward  
69 productive oligomerization on mitochondria, including ER-mitochondrial contact, activated  
70 receptors on the OMM, cardiolipin enrichment on the OMM (Macdonald et al., 2014; Bustillo-  
71 Zabalbeitia et al., 2014), and modification of Drp1 itself (Chang and Blackstone, 2007; Chang  
72 and Blackstone, 2010; Cribbs and Strack, 2007; Friedman et al., 2011; Toyama et al., 2016).  
73 Another division signal is actin polymerization mediated by the ER-bound formin protein INF2,  
74 which stimulates division by shifting the Drp1 oligomerization equilibrium toward productive  
75 oligomerization on mitochondria (Ji et al., 2015; Korobova et al., 2014; Korobova et al., 2013).  
76 Actin's stimulatory effect may be through direct interaction with Drp1 (Hatch et al., 2016; Ji et  
77 al., 2015). Third, there are multiple Drp1 receptors on the OMM in mammals, suggesting two

78 possibilities: 1) there are parallel pathways for Drp1 recruitment, each mediated by one of  
79 these receptors; or 2) these receptors act in a common pathway.

80

81 Protein receptors for Drp1 are necessary because, unlike other dynamin family members, Drp1  
82 does not contain a specific lipid-binding domain. Four single-pass OMM proteins have been  
83 identified as Drp1 receptors in mammals: Mff, Fis1, MiD49 and MiD51 (Richter *et al.*, 2015).  
84 Mff and Fis1 are tail-anchored proteins that are also found on peroxisomes, another organelle  
85 that undergoes Drp1-dependent division (Koch and Brocard, 2012; Schrader *et al.*, 2016). In  
86 contrast, MiD49 and MiD51 contain N-terminal transmembrane domains and appear to be  
87 restricted to mitochondria (Palmer *et al.*, 2013). Our database searches suggest that MiD49 and  
88 MiD51 are only present in vertebrates, whereas Mff is found in higher metazoans (coelomates,  
89 including arthropods and mollusks but not *C. elegans*) and Fis1 is expressed in all eukaryotes  
90 examined. Mff has consistently been found to be a key Drp1 receptor in mammals, while MiD49  
91 and MiD51 are important in specific situations (Loson *et al.*, 2013; Osellame *et al.*, 2016; Otera  
92 *et al.*, 2016; Shen *et al.*, 2014). Though Fis1 is the sole known Drp1 receptor in budding yeast,  
93 its role in mammals is unclear (Loson *et al.*, 2013; Osellame *et al.*, 2016; Otera *et al.*, 2016;  
94 Richter *et al.*, 2015; Shen *et al.*, 2014).

95

96 In this study, we examine Drp1 distribution among organelles in mammalian cells.  
97 Surprisingly, we find that Drp1 oligomers exist on ER, independent of mitochondrial or  
98 peroxisomal association. Populations of both Mff and Fis1 also exist on ER as punctate  
99 accumulations. Mff suppression or actin polymerization inhibition eliminates all detectable  
100 Drp1 oligomers, including the ER-bound population. We observe Drp1 accumulation at ER-  
101 bound Mff punctae, suggesting oligomeric assembly at these sites. Drp1 oligomers can transfer  
102 from ER to mitochondria or peroxisomes. Our results suggest a pathway for Drp1  
103 oligomerization on mitochondria involving initial assembly on ER, which is dependent upon  
104 both Mff and actin.



105 **Results**

106 *A sub-population of oligomeric Drp1 is bound to ER*

107 Previously, we used an U2OS cell line stably expressing GFP-Drp1 to show that the majority  
108 (~70%) of large Drp1 “punctae” associate with mitochondria (Ji *et al.*, 2015). These punctae  
109 likely represent Drp1 oligomers, which are clearly visible after removing the background GFP  
110 signal. To examine Drp1 localization and dynamics in more detail, we developed a GFP-Drp1  
111 CRISPR knock-in U2OS line (called GFP-Drp1-KI), in which ~50% of the endogenous Drp1 is  
112 GFP-tagged and overall Drp1 level is similar to control cells (Fig. S1 A, B). This cell line displays  
113 similar cell growth kinetics to WT cells (Fig. S1 C), and a similar percentage of mitochondrially-  
114 associated Drp1 punctae (63%) as the stably transfected GFP-Drp1 cell line (Fig. 1 A, B).

115

116 We examined the non-mitochondrially associated Drp1 punctae in more detail, postulating that  
117 they would be peroxisome-bound. Surprisingly, while some of these punctae are peroxisome-  
118 associated, an equal percentage (14.8%) is not associated with either mitochondria or  
119 peroxisomes, which we defined as “independent” Drp1 punctae (Fig. 1 A, B). The remaining  
120 punctae (7%) localize to areas of close association between mitochondria and peroxisomes.

121

122 We postulated that the independent population might be bound to ER. Indeed, 4-color live-cell  
123 imaging shows that a population of Drp1 punctae appears associated with ER, distinct from  
124 mitochondrial or peroxisomal populations (Fig. 1 C, Video 1). Independent Drp1 puncta can  
125 arise *de novo* from ER, maturing within 30 sec (Fig 1 D).

126

127 We quantified ER association of independent Drp1 punctae from time-lapse confocal videos,  
128 assessing stably associating punctae as those that do not separate from ER during the 2.5 min  
129 imaging time (1.6 sec frame rate). While ER occupies a significant portion of the imaging area  
130 in these cells ( $40.9 \pm 5.9\%$ , 22 ROIs, 2063 individual frames analyzed), there is a significantly  
131 higher percentage of independent Drp1 puncta in continual association with ER than would be  
132 expected by chance ( $76.7\% \pm 11.7\%$ , Fig. 1E). Other independent Drp1 punctae are associated  
133 with ER for a portion of the imaging period ( $8.9\% \pm 9.5\%$ ), with most only separating for one  
134 frame. A third population of independent Drp1 punctae displays no apparent association with  
135 ER ( $14.4\% \pm 8.0\%$ ). Cos7 cells transiently transfected with GFP-Drp1 also display ER-associated

136 Drp1 punctae, independent of either mitochondria or peroxisomes (Fig. S1D, E). In contrast,  
137 independent Drp1 punctae do not display appreciable association with endosomes, as judged by  
138 transferrin, Rab4b, and Rab7a markers (Fig. S2).

139  
140 One possible explanation for independent Drp1 punctae is that they are actually bound to  
141 mitochondrially-derived vesicles that bud from the OMM (Soubannier et al., 2012). We tested  
142 this possibility by imaging GFP-Drp1 and the OMM protein Tom20 in live cells. No overlapping  
143 Tom20-only signal is detectable at any time point in videos (4-min, 2 sec intervals) for 15 out of  
144 16 independent Drp1 punctae analyzed (Fig. S3). These results suggest that the majority of  
145 independent Drp1 punctae are not bound to mitochondrially-derived vesicles.

146  
147 Another explanation for the existence of independent Drp1 punctae could be that they  
148 represent unfolded protein aggregates. Indeed, studies in yeast and mammals show that  
149 protein aggregates can accumulate on ER, followed by transfer to mitochondria for degradation  
150 in the mitochondrial matrix (Ruan et al., 2017; Zhou et al., 2014). While GFP-Drp1 is not over-  
151 expressed in our CRISPR-engineered cell line (Fig. S1 A-C), the GFP tag or other features of this  
152 fusion protein could result in unfolding/aggregation. To test this possibility, we examined the  
153 distribution of endogenous Drp1 punctae in relation to mitochondria, peroxisomes and ER by  
154 immunofluorescence microscopy. Similar to GFP-Drp1, a sub-set of endogenous Drp1 punctae  
155 is independent of mitochondria or peroxisomes, and  $85.5\% \pm 9.7\%$  of these independent  
156 punctae display apparent ER association (Fig. S4A, B). To confirm specificity of Drp1  
157 immunofluorescence, siRNA suppression significantly reduces staining of all Drp1 populations  
158 (Fig. S4 A).

159  
160 We examined further the effect of the GFP tag by over-expressing oligomerization-deficient  
161 mutants of Drp1 that remain monomeric or dimeric at all concentrations tested biochemically  
162 (Frohlich et al., 2013; Hatch et al., 2016). Despite being expressed at significantly higher levels  
163 than WT Drp1 in our GFP-Drp1-KI cells, these Drp1 mutants display no apparent punctae (Fig.  
164 S4 C). If the GFP tag or over-expression were causing GFP-Drp1 unfolding and aggregation, the  
165 mutants might be expected to display similar properties. We conclude that a mechanism exists  
166 for Drp1 oligomer assembly on ER.

167

168 *Transfer of Drp1 from ER to mitochondria*

169 A range of dynamics exists for independent Drp1 punctae, with some puncta displaying little  
170 motility over a 5-min period (Fig. 1C, Video 1) while others display periods of rapid directional  
171 movement (Fig. 2A, Video 2). Independent Drp1 punctae can transfer to mitochondria (Fig. 2A,  
172 Video 2), and are ER-associated before transfer (Figure 2B, Video 3). We previously reported  
173 that most Drp1 oligomerization on mitochondria is non-productive for mitochondrial division,  
174 with only 3% of mitochondrially-associated Drp1 punctae resulting in division within a time  
175 scale of 10-min (Ji 2015). Similarly, while independent Drp1 punctae can transfer to  
176 mitochondria, division rarely occurs after these events. To increase division rate, we treated  
177 cells with ionomycin in the presence of serum, which causes a transient 4-fold increase in  
178 mitochondrial division as well as an increase in Drp1 oligomerization ((Ji et al., 2015), Fig. 3C.  
179 Fig. S5B). Upon ionomycin treatment, independent Drp1 puncta transfer to mitochondria  
180 followed by division (Fig. 2C, Video 4), with the puncta maintaining apparent association with  
181 ER during the transfer process (Fig. 2D, Video 5).

182

183 *Sub-populations of Mff and Fis1 are ER-associated*

184 We postulated that receptors on the ER membrane recruit Drp1 and enhance its  
185 oligomerization. Likely candidates for these receptors include proteins involved in  
186 mitochondrial Drp1 recruitment: Mff, MiD49, MiD51, and Fis1. There is no published evidence  
187 showing ER-bound populations of these proteins.

188

189 We first examined Mff, due to its importance for mitochondrial Drp1 recruitment in several  
190 studies (Loson et al., 2013; Osellame et al., 2016; Otera et al., 2016; Shen et al., 2014). Mff is a  
191 member of the tail-anchored family of integral membrane proteins (Gandre-Babbe and van der  
192 Blik, 2008; Otera et al., 2010), with a C-terminal trans-membrane domain that inserts into  
193 bilayers post-translationally. We developed a CRISPR-mediated Mff knock-out (KO) cell line,  
194 that displays no detectable Mff protein but control levels of Drp1, Fis1, MiD49, MiD51, and INF2  
195 (Fig. 3A). Similar to past studies, the Mff-KO line displays elongated peroxisomes (Fig. 3B).  
196 Mitochondrial division is almost completely eliminated in both unstimulated and ionomycin-  
197 stimulated cells (Fig. 3C). There is also a dramatic reduction in Drp1 punctae (Fig. 3D). Mff

198 suppression by siRNA causes similar effects, including dramatic inhibition of mitochondrial  
199 division in either un-stimulated or ionomycin-stimulated cells (Fig. S5 A,B), and near-complete  
200 elimination of all Drp1 punctae in GFP-Drp1-KI cells (Fig. S4 C, Fig. S5 C). These results show  
201 that Mff is a key factor for Drp1 oligomerization in U2OS cells.

202

203 Past studies have shown Mff localization on mitochondria and peroxisomes (Friedman *et al.*,  
204 2011; Gandre-Babbe and van der Bliik, 2008; Otera *et al.*, 2016; Otera *et al.*, 2010; Palmer *et al.*,  
205 2013). We asked whether a sub-population of endogenous Mff was ER-bound. Using  
206 immunofluorescence microscopy in U2OS cells, endogenous Mff has a relatively uniform  
207 distribution on mitochondria and peroxisomes. In addition, there is a punctate Mff population  
208 independent of these organelles, and  $89.3 \pm 6.7\%$  of these punctae associate with ER (Fig. 4A,  
209 B). This staining is specific for Mff, since Mff KD results in a dramatic reduction in all Mff  
210 populations (Fig. 4A).

211

212 We also examined the localization of exogenously expressed GFP-Mff in live cells. As with  
213 endogenous staining, GFP-Mff at low expression levels localizes to both mitochondria and  
214 peroxisomes. In addition, a population of independent Mff punctae is present, and  $86.1 \pm$   
215  $17.1\%$  of these punctae maintain continuous ER-association throughout the imaging period  
216 (Fig. 4C, D, Video 6). Mff contains four splice insert sites (Gandre-Babbe and van der Bliik,  
217 2008). We use the variant lacking all inserts (termed Mff-S) for most investigations, but find  
218 the variant including all inserts (Mff-L) also displays this ER-localized sub-population (Fig. S6A,  
219 B).

220

221 As a second approach to examine Mff distribution, we performed cell fractionation studies in  
222 U2OS cells. By differential centrifugation, the mitochondrial marker is confined to the low- and  
223 medium-speed pellets, whereas ER and peroxisome markers are also present in the high-speed  
224 pellet fraction (Fig. 4E). Similar to past studies (Otera 2016), Mff migrates as a ladder of bands  
225 and is present in all membrane fractions. Upon sucrose gradient fractionation of the medium-  
226 speed supernatant, ER and peroxisome markers largely separate, with a small fraction of  
227 peroxisome marker persisting in the ER fraction. Mff fractionates with the ER (Fig. 4E). These  
228 results suggest that a portion of Mff is ER-bound. To exclude the possibility that peroxisome

229 contamination causes apparent Mff presence in the ER fraction, we used PEX3-deficient human  
230 fibroblasts, which lack mature peroxisomes (Sugiura *et al.*, 2017). Similar to U2OS  
231 fractionation, PEX3-deficient cells contain an Mff population that fractionates with ER, and is  
232 devoid of mitochondrial and peroxisomal markers (Fig. 4F).

233

234 We also asked whether a sub-population of Fis1 is present on ER. Similar to Mff, Fis1 is a tail-  
235 anchored protein, previously reported on both mitochondria and peroxisomes (Kobayashi *et al.*  
236 *et al.*, 2007; Koch *et al.*, 2005; Stojanovski *et al.*, 2004; Yoon *et al.*, 2003). By immunofluorescence  
237 analysis of endogenous protein, we observe three Fis1 populations: mitochondrial,  
238 peroxisomal and independent (Fig. 5A), with  $79.9 \pm 11.3\%$  of the independent punctae  
239 displaying ER association (Fig. 5B). Fis1 depletion by siRNA strongly reduces all three of these  
240 Fis1 populations (Fig. 5A). Exogenously expressed GFP-Fis1 displays a similar population of  
241 punctae that are independent of the mitochondrial or peroxisomal Fis1 pools (Fig. 5C). Most of  
242 these independent Fis1 punctae are continually ER-associated throughout the imaging period  
243 ( $78.8\% \pm 26.9\%$ , Fig. 5D).

244

245 In contrast to Mff and Fis1, MiD49 and MiD51 contain N-terminal transmembrane domains. We  
246 examined the localization of MiD51-GFP expressed at low levels. Similar to past studies (Otera  
247 *et al.*, 2016), MiD51 is in punctate accumulations on mitochondria, with no evidence for a  
248 peroxisomal population. There is also no evidence for a population of independent MiD51 (Fig.  
249 S6C). We conclude that both Mff and Fis1 display populations that associate with ER  
250 independently of mitochondria or peroxisomes, while MiD51 is confined to mitochondria.

251

### 252 *Dynamic interactions between Drp1 and Mff on ER*

253 GFP-Mff punctae are dynamic on the ER, frequently moving and fluctuating in intensity (Fig. 4C,  
254 Video 6). We examined Mff punctae morphology and dynamics in more detail using Airyscan  
255 microscopy. As observed in the confocal images, Mff is generally distributed evenly on the  
256 surface of mitochondria and peroxisomes at low expression level, but has some regions of  
257 enrichment on both organelles (Fig. 6A, Video 7). This enrichment is particularly noticeable on  
258 peroxisomes, with one or two highly concentrated regions (Fig. 6B). The size of ER-bound Mff  
259 punctae ( $220 \pm 56$  nm,  $n = 19$ ) is close to the resolution limit of Airyscan and smaller than the

260 enriched Mff regions on peroxisomes (Fig. 6 C). Interestingly, ER-bound Mff punctae  
261 periodically appear to transfer to mitochondria (Fig. 6 A, Video 7).

262

263 We next examined the relationship between Mff and Drp1 punctae on ER, using our GFP-Drp1-  
264 KI cell line transiently expressing mStrawberry-Mff at low levels. Being limited to 4-color  
265 imaging, we labeled both mitochondria and peroxisomes with BFP, and labeled ER with an E2-  
266 crimson marker (Fig. 7A, Video 8). From quantification of live-cell time-lapse images, ~70% of  
267 the ER-bound Drp1 and Mff punctae co-associate for the entirety of the 3-min imaging period  
268 (98 of 140 Mff punctae associated with Drp1, 84 of 140 Drp1 punctae associated with Mff).  
269 There are also instances of Drp1 appearance from previously existing Mff punctae (Fig. 7A,  
270 Video 8), suggesting that ER-bound Mff punctae are sites of Drp1 oligomerization.  
271 Interestingly, the number of independent Mff punctae decreases ~ 4-fold upon Drp1  
272 suppression by siRNA, either when analyzing GFP-Mff in live cells (4.5-fold decrease, Fig. 7B, C),  
273 or endogenous Mff by immunofluorescence (3.9-fold decrease, Fig. 7D).

274

#### 275 *ER-localized Mff enhances mitochondrial division rate*

276 To test the functional significance of ER-targeted Mff, we designed a rapamycin-inducible  
277 system in which Mff lacking its transmembrane domain could be targeted to either  
278 mitochondria or ER, using the targeting sequences of AKAP1 and Sac1, respectively (Fig. 8A,  
279 (Csordas et al., 2010)). A similar approach has been used to target Mff to lysosomes (Liu and  
280 Chan, 2015). Rapamycin treatment results in rapid Mff translocation from cytosol to  
281 mitochondria in Mff-KO U2OS cells (Fig. 8B). Rapamycin-induced translocation to ER is also  
282 rapid, but with some Mff still present in cytoplasm (Fig. 8C). We used this system to test the  
283 effect of targeting Mff to specific locations (mitochondria alone, ER alone, or to both  
284 mitochondria and ER) on mitochondrial division rate in Mff-KO cells. While either  
285 mitochondrial or ER targeting causes partial rescue, targeting Mff to both organelles brings the  
286 mitochondrial division rate back to the level of control cells (Fig. 8D). The enhanced effect of  
287 expressing both mitochondrial and ER targeting signals is not due to increased expression of  
288 Mff or of Drp1 (Fig. 8E). These results suggest that ER targeting of Mff has a stimulatory effect  
289 on mitochondrial division.

290

291

292

293 *ER-associated Drp1 oligomers are dependent on INF2-mediated actin polymerization*

294 In a previous study (Ji *et al.*, 2015), we found that ionomycin enhances Drp1 maturation on  
295 mitochondria. To test whether ionomycin can trigger ER-associated Drp1 maturation as well,  
296 we tracked independent Drp1 punctae upon ionomycin treatment. Ionomycin significantly  
297 increases both the number (Fig. 9, Video 9) and size (Fig. 10A, B) of independent Drp1 punctae.

298

299 Our previous studies also showed that mitochondrially-bound Drp1 oligomers are significantly  
300 decreased by actin polymerization inhibitors (Korobova *et al.*, 2013) and that actin  
301 polymerization inhibitors block the ionomycin-induced increase in Drp1 oligomerization (Ji *et*  
302 *al.*, 2015). We tested the effect of Latrunculin A (LatA), an actin polymerization inhibitor, on  
303 ER-bound Drp1 oligomers. Pre-treatment for 10 min with LatA causes a significant reduction in  
304 all Drp1 punctae prior to ionomycin treatment, and a near-complete block of independent Drp1  
305 punctae maturation upon ionomycin treatment (Fig. 9, Video 10).

306

307 We have shown that the formin INF2 is required for actin polymerization leading to efficient  
308 mitochondrial division (Korobova *et al.*, 2013) as well as mitochondrial accumulation of  
309 oligomeric Drp1 (Ji *et al.*, 2015). The isoform of INF2 responsible for these effects is tightly  
310 bound to ER (Chhabra *et al.*, 2009), suggesting that it could also play a role in ER-bound Drp1  
311 oligomerization. We therefore tested whether INF2 played a role in independent Drp1 punctae  
312 accumulation. Suppression of INF2 by siRNA causes a 6.8-fold decrease in independent Drp1  
313 punctae (Fig. 10C, D). These results indicate that INF2-mediated actin polymerization is  
314 necessary for ER-associated Drp1 oligomerization.

315



316 **Discussion:**

317 A major finding in this work is the identification of dynamic sub-populations of Drp1, Mff and  
318 Fis1 on ER, distinct from the mitochondrial and peroxisomal populations of these proteins. An  
319 earlier study suggested that Drp1 could localize to ER (Yoon et al., 1998), but this study did not  
320 include mitochondrial or peroxisomal markers so specific localization to ER is unclear. There  
321 has been no previous identification of ER-bound sub-populations of any wild-type Drp1  
322 receptor. We carefully examined previous publications for evidence of such localization for Mff  
323 (Friedman et al., 2011; Gandre-Babbe and van der Bliek, 2008; Otera et al., 2016; Palmer et al.,  
324 2013) or Fis1 (Kobayashi et al., 2007; Koch et al., 2005; Stojanovski et al., 2004; Yoon et al.,  
325 2003). Most of these studies do not stain for both peroxisomes and mitochondria, but in two  
326 studies using both markers we find evidence for Mff (Palmer et al., 2013) and Fis1 (Kobayashi  
327 et al., 2007) punctae that are not bound to either organelle. The low abundance of these  
328 independent punctae, and their low intensities compared to both the mitochondrial and  
329 peroxisomal pools, could explain why this population has not been identified previously.  
330 Interestingly, a recent proteomic study identified an apparent ER-linked pool of Mff by  
331 proximity ligation (Hung et al., 2017), which could be an ER-bound population but could  
332 alternately represent a population at ER-mitochondrial contact sites.

333  
334 Mff and Fis1 are tail-anchored (TA) proteins that are inserted into membranes post-  
335 translationally. TA proteins are found in essentially all cellular membranes, including ER,  
336 mitochondria and peroxisomes. Insertion mechanisms for ER-based TA proteins are best  
337 understood, with the GET/TRC40 complex being an important pathway (Denic et al., 2013;  
338 Mateja et al., 2015; Schuldiner et al., 2008; Stefanovic and Hegde, 2007), and the recently  
339 identified SND pathway being an alternate route (Aviram et al., 2016). At present, the  
340 pathways controlling TA protein targeting to mitochondria or peroxisomes are less well  
341 understood, with evidence for three routes: 1) protein-free insertion (Krumpe et al., 2012), 2)  
342 protein-mediated insertion (Yagita et al., 2013), and 3) delivery from ER (Lam et al., 2010;  
343 Schuldiner et al., 2005; van der Zand et al., 2010).

344  
345 The presence of Mff and Fis1 on all three membranes does not clarify their delivery  
346 mechanisms, but their wider distribution suggest mechanisms that would lead to both ER and



347 mitochondrial insertion. Interestingly, one study (Stojanovski et al., 2004) showed that  
348 mutagenesis of two C-terminal lysines in mammalian Fis1 caused a shift in its localization from  
349 mitochondria to ER, which might suggest mitochondrial localization signals in the C-terminus  
350 similar to findings for other proteins (Horie et al., 2002). It is also interesting that Mff is  
351 undetectable in the peroxisomes present in the “light” membrane fraction of U2OS cells (Fig.  
352 4E), suggesting these peroxisomes are different from those in the heavier membrane fractions.

353

354 While we provide evidence that the ER-localized pool of Mff acts in mitochondrial division,  
355 there are other possible explanations for Mff’s presence on ER. First, a portion of the ER pool  
356 might represent a transient intermediate in Mff’s bio-synthetic pathway, in which it is first  
357 inserted into the ER membrane then transferred to the OMM. Alternately, a portion ER-bound  
358 Mff and Fis1 might represent mis-localized protein that is subsequently sorted to the OMM by a  
359 secondary sorting mechanism. These possibilities are not mutually exclusive with the existence  
360 of a functional pool of ER-localized Mff. Better understanding of targeting mechanisms for Mff  
361 is required, including pulse-chase localization studies to determine whether an ER intermediate  
362 exists.

363

364 Recent studies in budding yeast and mammals show that aggregates of misfolded protein can  
365 bind ER, then move to the mitochondrial matrix for proteolysis (Ruan et al., 2017; Zhou et al.,  
366 2014). However, several lines of evidence strongly suggest that the ER-bound punctae of Drp1,  
367 Mff and Fis1 observed here are not protein aggregates. First, in all three cases we observe  
368 these punctae using immunofluorescence for endogenous proteins, arguing against over-  
369 expression artifact. Second, GFP-fusions of non-oligomerizable Drp1 mutants do not display  
370 ER-bound punctae, even when expressed at significantly higher levels than wild-type GFP-  
371 Drp1. Third, ER-bound Drp1 punctae are virtually absent in the following conditions: Mff  
372 knock-out, actin polymerization inhibition, and suppression of the actin polymerization factor  
373 INF2. All of these conditions inhibit mitochondrial division but are not known to be related to  
374 aggregated protein responses. LatA treatment reduces the number of independent Drp1  
375 punctae within 10 min, demonstrating the dynamic nature of this population.

376

377 Another possibility is that independent Drp1 or Mff punctae represent mitochondrially-derived  
378 vesicles (MDVs) containing OMM but not IMM. Our imaging of Drp1 and the OMM protein  
379 Tom20 suggest that this is not the case, as we observe no consistent co-localization. Even so,  
380 MDVs can have heterogeneous composition (Soubannier et al., 2012), which leaves the  
381 possibility open that the independent punctae are bound to a specific MDV sub-type. Since the  
382 majority of independent Drp1, Mff and Fis1 punctae track tightly with ER in live-cell imaging,  
383 any MDV would likely be associated with ER in this case.

384  
385 One possible functional role of ER-assembled Drp1 is in mitochondrial division. In support of  
386 this function, 1) we observe transfer of Drp1 punctae from ER to mitochondria; 2) we observe  
387 mitochondrial division following ER-to-mitochondrial Drp1 transfer; and 3) in Mff-KO cells,  
388 targeting Mff to both ER and mitochondria is more efficient in rescuing mitochondrial division  
389 than is targeting to either ER or mitochondria alone. There are uncertainties in this correlation.  
390 Limitations of confocal microscopy in both spatial and temporal resolution make it difficult to  
391 be certain of direct ER-to-mitochondrial Drp1 transfer. In addition, there is a significant  
392 amount of ER-to-mitochondrial Drp1 transfer that does not result in mitochondrial division. To  
393 observe mitochondrial division following ER-to-mitochondrial Drp1 transfer, we stimulate  
394 division frequency with the calcium ionophore ionomycin. However, mitochondrial division in  
395 general occurs at low frequency, and the vast majority of mitochondrially-bound Drp1 punctae  
396 in general are non-productive for mitochondrial division (Ji et al., 2015), suggesting that Drp1  
397 oligomerization is in dynamic equilibrium independent of mitochondrial division.

398  
399 From our findings, we propose a working model that includes a role for ER in Drp1  
400 oligomerization and recruitment prior to interaction with mitochondria or peroxisomes. The  
401 combination of ER-bound Mff and INF2-mediated actin polymerization on ER serves as an  
402 initiation site for recruitment of Drp1 oligomers. These Drp1 oligomers can be transferred to  
403 mitochondria or peroxisomes upon ER contact, where they can serve in the assembly of  
404 mitochondrially-bound Drp1 oligomers capable of mitochondrial division. This Drp1 transfer  
405 can occur without transfer of the receptors themselves, although we have observed movement  
406 of Mff punctae between ER and mitochondria. Further study of these dynamics is needed.

407

408 Assembly on ER is likely to be only one component of Drp1's oligomeric equilibrium, in  
409 addition to direct assembly on mitochondria or peroxisomes. Another possibility is that the  
410 independent Drp1 punctae observed here represent a minor proportion of all ER-bound Drp1  
411 oligomers, with the vast majority being assembled on ER at ER-mitochondrial contact sites.  
412 Due to the close proximity of ER-mitochondrial contact sites (Csordas et al., 2010), imaging  
413 Drp1 transfer at these sites is challenging by current live-cell techniques.

414

415 Our work adds another layer to the understanding of roles for mammalian Drp1 receptors (Mff,  
416 Fis1, MiD49 and MiD51) in mitochondrial and peroxisomal division. The current picture is  
417 somewhat murky, with recent knock-down/knock-out studies in several cell lines providing  
418 largely overlapping but at times conflicting results (Loson et al., 2013; Osellame et al., 2016;  
419 Otera et al., 2016; Shen et al., 2014). One feature of clear agreement is that neither MiD49 nor  
420 MiD51 localizes to peroxisomes, and neither participates in peroxisomal division (Otera et al.,  
421 2016; Palmer et al., 2013). Another common theme is that MiD49 and MiD51 are at least  
422 partially redundant with each other, and have the capability of acting independently of Mff  
423 (Loson et al., 2013; Osellame et al., 2016; Otera et al., 2016; Palmer et al., 2013). Most studies  
424 find the role of Fis1 in Drp1 recruitment and mitochondrial/peroxisomal division to be minor  
425 at best, although one study finds more significant effects (Shen et al., 2014). Deletion of Mff  
426 typically has the most dramatic effects on both Drp1 recruitment and mitochondrial division,  
427 but one study finds that MiD49/51 deletion has comparable effects (Osellame et al., 2016). The  
428 differing results may be partly due to cellular context. In mitophagy, for example, Fis1 might  
429 play a role in Drp1 recruitment downstream of Mff (Shen et al., 2014). During apoptosis, MiD49  
430 and MiD51 have roles in cristae remodeling (Otera et al., 2016), although other Drp1 receptors  
431 clearly function in apoptosis as well (Osellame et al., 2016).

432

433 We make three important findings on Drp1 receptors in this work. First, Mff is of fundamental  
434 importance in U2OS cells, since either siRNA-mediated suppression or CRISPR-mediated knock-  
435 out strongly reduce both Drp1 oligomerization and mitochondrial division. Second, U2OS cells  
436 have ER-bound populations of both Mff and Fis1. Third, the majority of ER-bound Drp1  
437 punctae co-localize with Mff. These populations appear to be co-dependent, with reduction of

438 either Drp1 or Mff reducing punctae of the other protein on ER. Presumably, Drp1  
439 oligomerization recruits additional Mff from the bulk ER.

440

441 One open question concerns why there are so many potential mechanisms for regulating Drp1,  
442 including: multiple receptors (MiD49, MiD51, Fis1), Drp1 post-translational modification  
443 (Chang and Blackstone, 2007; Chang and Blackstone, 2010; Cribbs and Strack, 2007),  
444 cardiolipin enrichment on the OMM (Macdonald et al., 2014; Bustillo-Zabalbeitia et al., 2014),  
445 actin polymerization (Korobova et al., 2013; Li et al., 2014; Ji et al., 2015; Moore et al., 2016),  
446 and ER-mitochondrial contact (Friedman et al., 2011). Do these mechanisms operate in concert  
447 or independently? Given that Drp1 oligomer assembly and disassembly are constantly in flux  
448 on mitochondria (Ji et al., 2015), the answer could be “both”. A critical threshold of Drp1  
449 oligomerization and mitochondrial recruitment is necessary, regardless of the means by which  
450 oligomerization/recruitment are activated. In this model, a variety of combinations of these  
451 activators can lead to the final outcome of division-productive Drp1 oligomerization. Other  
452 aspects of Drp1-mediated force generation may be similarly nuanced (Ramachandran, 2017).  
453 Importantly, the ER-based recruitment of Drp1 oligomers represents only one of these  
454 activation mechanisms, and its loss may be compensated by up-regulation of the other  
455 mechanisms. An additional step may be recruitment of dynamin 2 late in the process (Lee et al.,  
456 2016), which would be subject to its own regulation.

457

458 This study extends our findings on the role of actin in mitochondrial division by showing actin  
459 polymerization is necessary for initiation and growth of ER-bound Drp1 oligomers. We have  
460 proposed direct binding of Drp1 to actin filaments as a potential mechanism for increasing  
461 productive Drp1 oligomerization (Hatch et al., 2016; Ji et al., 2015). The presence of the formin  
462 INF2 on ER (Chhabra et al., 2009) and its importance for Drp1 recruitment to mitochondria (Ji  
463 et al., 2015; Korobova et al., 2013) suggest that INF2-mediated actin polymerization on ER, in  
464 conjunction with Mff on ER, might mediate ER-based Drp1 oligomerization. Actin  
465 polymerization has been implicated in mitochondrial division in many contexts (De Vos et al.,  
466 2005; Duboff et al., 2012; Moore et al., 2016) and additional actin-binding proteins on  
467 mitochondria (Manor et al., 2015) and in cytosol (Li et al., 2015; Moore et al., 2016) have been

468 implicated. It will be interesting to elucidate if and how these proteins work together in this  
469 process.

470

471 Given the presence of Drp1 oligomers on ER, and its role in constriction of mitochondria and  
472 peroxisomes, it is tempting to speculate that Drp1 might mediate some aspect of ER membrane  
473 dynamics. Past studies have suggested that dominant-negative Drp1 mutants change ER  
474 structure (Pitts et al., 1999). While we have occasionally observed Drp1 punctae at sites of ER  
475 tubule breakage (not shown), these instances are rare. Nevertheless, the presence of Drp1, Mff  
476 and Fis1 on ER expands mechanistic possibilities for membrane dynamics in general.

477 **Materials and Methods**

478 **Plasmids and siRNA oligonucleotides**

479 mCherry-mito-7 was purchased from Addgene (#55102), and consists of the mitochondrial  
480 targeting sequence from subunit VIII of human cytochrome C oxidase N-terminal to mCherry.  
481 mito-BFP construct were previously described(Friedman et al., 2011), and consist of amino  
482 acids 1-22 of *S. cerevisiae* COX4 N-terminal to BFP. Tom20-mCherry was previously described  
483 in(Ji et al., 2015). eBFP-Peroxisome was constructed by replacing the CFP sequence of CFP-  
484 Peroxisome containing peroxisomal targeting signal 1 (PTS1) (Addgene #54548) with eBFP2,  
485 cut from eBFP2 -Mito7 (Addgene #55248) with BsrGI/BamHI. mPlum-mito3 was purchased  
486 from Addgene (#55988). ER-tagRFP was a gift from Erik Snapp (Albert Einstein College of  
487 Medicine, New York City), with prolactin signal sequence at 5' of the fluorescent protein and  
488 KDEL sequence at 3'. pEF.myc.ER-E2-Crimson was purchased from Addgene (#38770). Mff-S  
489 and MiD51 cloned by reverse transcriptase-PCR from RNA isolated from HEK293 cells and cloned into  
490 eGFP-C1 (Mff) or eGFP-N1 (MiD51) vectors (Clontech Inc). GFP-Mff-L was purchased from Addgene  
491 (#49153). mStrawberry-Mff-S was constructed by replacing GFP with mStrawberry using  
492 Sall/BamHI. MiD51-mStrawberry was constructed by cutting MiD51 from MiD51-GFP and  
493 pasting into mStrawberry-N1 vector using Bgl II/BamH1. GFP-Fis1 was a gift from Mike Ryan  
494 (Monash University, Melbourne, Australia). mStrawberry-Rab4b and mStrawberry-Rab7a were  
495 gifts from Mitsunori Fukada (Tohoko University, Sendai, Japan) (Matsui et al., 2011). In our  
496 nomenclature for Mff isoforms, Mff-S corresponds to isoform 8 (no alternately spliced exons)  
497 and Mff-L corresponds to isoform 1 (containing all alternately spliced exons) from (Gandre-  
498 Babbe and van der Blik, 2008). Drp1 mutants that maintain the monomeric (K642E) or  
499 dimeric (K401-404A) states were described in (Hatch et al., 2016). Rapamycin-inducible  
500 constructs include the following. Mitochondrial targeting construct: amino acids 1-31 of  
501 mouse AKAP1 fused to FKBP12. ER-targeting construct: C-terminal sequence of human/mouse  
502 Sac1 fused to FKBP12. Both mitochondrial- and ER-targeted FKBP12 constructs were generous gifts  
503 of Gyorgy Hajnoczky (Csordas et al., 2010). GFP-Mff inducibly-targetable construct: the cytoplasmic  
504 region (amino acids 1-197) of human Mff-S fused to GFP on the N-terminus and FRB on the C-  
505 terminus.

506

507 Oligonucleotides for human Mff siRNA were synthesized by Qiagen against target sequence 5'-  
508 ACCGATTTCTGCACCGGAGTA-3'. Oligonucleotides for MiD51 were synthesized by Qiagen  
509 against sequence 5'- CAGTATGAGCGTGACAAACAT -3' (siRNA#1), and 5'-  
510 CCTGGTCTTTCTCAACGGCAA -3' (siRNA#2). Oligonucleotides for MiD49 were synthesized by  
511 Qiagen against sequence 5'- TTGGGCTATGGTGGCCATAAAA-3' (siRNA#1), and 5'-  
512 CTGCTGAGAGAAGGTGACTTA-3' (siRNA#2). Oligonucleotides for Fis1 were synthesized by IDT  
513 against target sequence 5'-GUACAAUGAUGACAUCCUAAAGGC-3' (siRNA#1), and 5'-  
514 ACAUGAUGACAUCCGUAAAGGCAT-3' (siRNA#2). Oligonucleotides for human total INF2 siRNA  
515 were synthesized by IDT Oligo against target sequence 5'- GGAUCAACCUGGAGAUCAUCCGC-3' .  
516 Oligonucleotides for human Drp1siRNA were synthesized by IDT Oligo against target sequence  
517 5'-GCCAGCUAGAUUAACAACAAGAA-3'. As a control, Silencer Negative Control 5'-  
518 CGUAAUCGCGUAUAAUACGCGUAT-3' (Ambion) was used.



519

520 **Antibodies**

521 Anti-Mff (ProteinTech, 17090-1-AP) was used at 1:1000 dilution for western (WB) and 1:500  
522 dilution for immunofluorescence (IF). Anti-Fis1 (ProteinTech, 10956-1-AP) was used at 1:1000  
523 for WB and 1:500 for IF. Anti-Tubulin (DM1- $\alpha$ , Sigma/Aldrich) was used at 1:10,000 dilution for  
524 WB. Drp1 was detected using a rabbit monoclonal antibody (D6C7, Cell Signaling Technologies)  
525 at 1:500 dilution for IF. Anti-INF2 rabbit polyclonal was described previously (Ramabhadran et  
526 al., 2011). Organelle marker antibodies for WB include: anti-ATP synthase mouse monoclonal  
527 (Molecular Probes A21351), anti-Sec63 (Aviva ARP46839), and anti-Pmp70 rabbit polyclonal  
528 (Sigma 4200181), all used at 1:1000.

529

530 **Cell culture, transfection**

531 Human osteosarcoma U2OS cells (American Type Culture Collection HTB96) were grown in  
532 DMEM (Invitrogen) supplemented with 10% calf serum (Atlanta Biologicals). Human PEX3-  
533 deficient fibroblasts (PBD400-T1) were a kind gift from Heidi McBride (Montreal Neurological  
534 Institute) and were grown in DMEM supplemented with 10% fetal calf serum (Atlanta  
535 Biologicals) and non-essential amino acids (GIBCO). To make the GFP-Drp1 KI U2OS cell line by  
536 CRISPR-Cas9, we used the GeCKO system (Zhang laboratory, MIT, [http://genome-  
537 engineering.org/gecko/](http://genome-engineering.org/gecko/)). The donor plasmid contained eGFP (A206K mutant) flanked by 445  
538 bases upstream of hDrp1 start codon and 308 bases downstream from start (synthesized by  
539 IDT). The target guide sequence (CATTCATTGCCGTGGCCGGC) was predicted using the GeCKO  
540 website program and made by IDT. Donor and guide plasmids were transfected into U2OS cells  
541 at a 3:1 molar ratio using Lipofectamine 2000 (Invitrogen). Cells were put under puromycin  
542 selection and clones were selected by FACS sorting and single cell cloning, then verified by IF  
543 and Western blotting.

544 For transfection of the U2OS or Drp1 KI lines, cells were seeded at  $4 \times 10^5$  cells per well in a 6-  
545 well dish ~16 hours prior to transfection. Plasmid transfections were performed in OPTI-MEM  
546 media (Invitrogen) with 2  $\mu$ L Lipofectamine 2000 (Invitrogen) per well for 6 hours, followed by  
547 trypsinization and re-plating onto concanavalin A (ConA, Sigma/Aldrich, Cat. No. C5275)-  
548 coated glass bottom MatTek dishes (P35G-1.5-14-C) at  $\sim 3.5 \times 10^5$  cells per well. Cells were  
549 imaged in live cell media (Life Technologies, Cat.No. 21063-029), ~16-24 hours after  
550 transfection.

551 For all experiments, the following amounts of DNA were transfected per well (individually or  
552 combined for co-transfection): 500 ng for mito-BFP, eBFP2-Peroxisome, and mCherry-mito7;  
553 850 ng for Tom20-mCherry; 1000 ng for ER-tagRFP, mPlum-mito3, and pEF.myc.ER-E2-  
554 Crimson; 100 ng for GFP-Mff-S, mStrawberry-Mff-S, GFP-Mff-S, and GFP-Fis1; 50 ng for MiD51-  
555 mStrawberry; 30 ng for mStrawberry-Rab4b and mStrawberry-Rab7a. 1000ng for AKAP1-  
556 FKBP12, and 500ng for Sac1-FKBP12 and GFP-Mff-FRB.

557 For siRNA transfections, cells were plated on 6 well plates with 30-40% density, and 2  $\mu$ l  
558 RNAimax (Invitrogen) and 63 pg of siRNA were used per well. Cells were analyzed 72-84 hour  
559 post-transfection for suppression.

#### 560 **Live imaging by confocal and Airyscan microscopy**

561 Cells were grown on glass bottom matTek dishes coated with ConA (coverslips treated for ~2  
562 hours with 100  $\mu$ g/mL ConA in water at room temperature). MatTek dishes were loaded to a  
563 Wave FX spinning disk confocal microscope (Quorum Technologies, Inc., Guelph, Canada, on a  
564 Nikon Eclipse Ti microscope), equipped with Hamamatsu ImageM EM CCD cameras and  
565 Bionomic Controller (20/20 Technology, Inc) temperature-controlled stage set to 37°C. After  
566 equilibrating to temperature for 10 min, cells were imaged with the 60x 1.4 NA Plan Apo  
567 objective (Nikon) using the 403 nm laser and 450/50 filter for BFP, 491 nm and 525/20 for  
568 GFP, 561 nm and 593/40 for mStrawberry or mCherry, and 640 nm and 700/60 for mPlum and  
569 E2-Crimson. For rapamycin induction, cells were treated with freshly prepared rapamycin  
570 (Fisher Scientific, 10 mM Stock in DMSO, 10  $\mu$ M final concentration on cells) during imaging.

571 Airyscan images were acquired on LSM 880 equipped with 63x/1.4 NA plan Apochromat oil  
572 objective, using the Airyscan detectors (Carl Zeiss Microscopy, Thornwood, NY). The Airyscan  
573 uses a 32-channel array of GaAsP detectors configured as 0.2 Airy Units per channel to collect  
574 the data that is subsequently processed using the Zen2 software. After equilibrating to 37 °C for  
575 30 min, cells were imaged with the 405 nm laser and 450/30 filter for BFP, 488 nm and 525/30  
576 for GFP, 561 nm and 595/25 for mStrawberry or mCherry, and 633 nm and LP 625 for mPlum.

#### 577 **Immunofluorescence staining**

578 Cells were fixed with 4% formaldehyde (Electron Microscopy Sciences, PA) in phosphate-  
579 buffered saline (PBS) for 10 min at room temperature. After washing with PBS three times, cells  
580 were permeabilized with 0.1% Triton X-100 in PBS for 15 min on ice. Cells were then washed  
581 three times with PBS, blocked with 0.5% BSA in PBS for 1 hour, and incubated with primary  
582 antibodies in diluted blocking buffer overnight. Wash with PBS three times. Mff or Fis1  
583 polyclonal antibodies (Rabbit) were conjugated to Alexa Fluor 488 while PMP70 antibodies  
584 (Rabbit) were conjugated to Alexa Fluor 647 (Zenon Tricolor Rabbit IgG1 Labeling Kit,  
585 Molecular Probes, Invitrogen); Secondary antibodies were applied for 1hr at room temperature.  
586 After washing with PBS three times, samples were mount on vectashield (Vector lab. H-1000).

587

#### 588 **Image analysis**

##### 589 *ER association of Drp1, Mff and Fis1*

590 Cells expressing GFP-Drp1, Mff or Fis1, and markers for ER, mitochondria and peroxisomes,  
591 were imaged in a single focal plane for three min at 1.5-2 sec intervals. Regions of cells where  
592 tubular ER could be readily resolved and appeared continuous in a single plane of view were  
593 analyzed. Independent Drp1, MFF, or Fis1 punctae were counted as always associated if they  
594 remained in contact with the ER during every frame of the video, sometimes ER associated if



595 the independent punctae contacted the ER at least half of total frames where punctae are  
596 visible, and not ER associated if no ER contact was visible.

#### 597 *Drp1 punctae quantification*

598 Drp1 KI cells transiently transfected with mitochondrial markers were imaged live by spinning  
599 disc confocal fluorescence microscopy for 10 min at 3 sec intervals in a single focal plane.  
600 Regions of interest with readily resolvable mitochondria and Drp1 were processed as described  
601 previously (Ji *et al.*, 2015). We thresholded mitochondrially associated Drp1 punctae by using  
602 the Colocalization ImageJ plugin with the following parameters: Ratio 50%(0-100%);  
603 Threshold channel 1: 30 (0-255); Threshold channel 2: 30 (0-255); Display value: 255 (0-255).  
604 Mitochondrially associated Drp1 punctae were further analyzed by Trackmate as described  
605 previously (Ji *et al.*, 2015). The number of Drp1 punctae were automatically counted frame-by-  
606 frame using the Find Stack Maxima ImageJ macro. The density of independent Drp1 punctae  
607 was quantified by visual assessment of each Drp1 puncta in an ROI for association with the  
608 mitochondria or peroxisome marker. Those punctae associated with neither mitochondria or  
609 peroxisomes were classified as independent. The result is expressed as number of independent  
610 Drp1 punctae per area of the ROI in square microns.

611

#### 612 *Mitochondrial division rate*

613 Described in detail in (Ji *et al.*, 2015). Suitable ROI's were selected for analysis based on  
614 whether individual mitochondria were resolvable and did not leave the focal plane. Files of  
615 these ROIs were assembled, then coded and scrambled by one investigator, and analyzed for  
616 division by a second investigator in a blinded manner as to the treatment condition. The  
617 second investigator scanned the ROIs frame-by-frame manually for division events, and  
618 determined total mitochondrial length within the ROI using the ImageJ macro, Mitochondrial  
619 Morphology. The results were then given back to the first investigator for de-coding. Division  
620 rate was analyzed over a 10-min period after DMSO, ionomycin (4  $\mu$ M) or rapamycin (10  $\mu$ M)  
621 treatment, depending on the experiment.

622

#### 623 **Cell Fractionation**

624 Modification of method in (Clayton and Shadel, 2014). All protease inhibitors from EMD  
625 Chemicals. For U2OS, cells (12 x 75 cm<sup>2</sup> flasks grown to approximately 70% confluence) were  
626 harvested by trypsinization and washed 3x with PBS. Post-trypsinization, all steps conducted  
627 at 4°C or on ice. The cell pellet (approximately 0.2 mL) was resuspended in 5.4 mL hypotonic  
628 buffer (10 mM Tris-HCl pH 7.5, 10 mM NaCl, 1.5 mM MgCl<sub>2</sub>, protease inhibitors (2  $\mu$ g/mL  
629 leupeptin, 10  $\mu$ g/mL aprotinin, 2  $\mu$ g/mL pepstatin A, 5  $\mu$ g/mL calpain inhibitor 1, 5  $\mu$ g/mL  
630 calpeptin, 1 mM benzamidine, 0.05  $\mu$ g/mL cathepsin B inhibitor II), incubated for 10 min and  
631 lysed by dounce (Wheaton Dura-Grind), followed by addition of 3.6 mL 2.5x isotonic buffer  
632 (525 mM mannitol, 175 mM sucrose, 12.5 mM Tris-HCl pH 7.5, 2.5 mM EDTA, protease  
633 inhibitors). The lysate was centrifuged at 1300xg for 5 min (low-speed centrifugation). The  
634 low-speed supernatant was centrifuged at 13,000xg for 15 min (medium-speed centrifugation).  
635 The medium-speed supernatant was centrifuged at 208,000xg for 1 hr (high-speed  
636 centrifugation). For PEX3-deficient fibroblasts, conditions were similar except that four  
637 centrifugation speeds were used, following (Sugiura *et al.*, 2017): 800xg for 10 min (nuclei and

638 un-lysed cells, discarded), 2300xg (low-speed centrifugation), 23,000xg (medium-speed  
639 centrifugation), and 208,000xg for 1 hr (high-speed centrifugation). All pellets were washed  
640 with 1x isotonic buffer then resuspended in SDS-PAGE buffer. For sucrose gradient  
641 fractionation, the medium-speed supernatant (3.4 mL) was layered onto a discontinuous  
642 gradient containing equal volumes (1.9 mL) of 0.5, 0.75, 1, and 1.3 M sucrose (all in the  
643 background of 1x isotonic buffer), and centrifuged for 1 hr at 35,000 rpm in an SW41 rotor  
644 (Beckman Coulter) with no brake. Fractions (1 mL) were removed from top.

#### 645 **Western blotting**

646 Cells were grown on 6 well plate, trypsinized, washed with PBS and resuspended 50  $\mu$ L PBS.  
647 This solution was mixed with 34  $\mu$ L of 10% SDS and 1  $\mu$ L of 1 M DTT, boiled 5 minutes, cooled  
648 to 23°C, then 17  $\mu$ L of 300 mM of freshly made NEM in water was added. Just before SDS-PAGE,  
649 the protein sample was mixed 1:1 with 2xDB (250 mM Tris-HCl pH 6.8, 2 mM EDTA, 20%  
650 glycerol, 0.8% SDS, 0.02% bromophenol blue, 1000 mM NaCl, 4 M urea). Proteins were  
651 separated by 7.5% SDS-PAGE and transferred to a polyvinylidene difluoride membrane  
652 (Millipore). The membrane was blocked with TBS-T (20 mM Tris-HCl, pH 7.6, 136 mM NaCl,  
653 and 0.1% Tween-20) containing 3% BSA (Research Organics) for 1 hour, then incubated with  
654 the primary antibody solution at 4°C overnight. After washing with TBS-T, the membrane was  
655 incubated with horseradish peroxidase (HRP)-conjugated secondary antibody (Bio-Rad) for 1  
656 hour at room temperature. Signals were detected by Chemiluminescence (Pierce). For western  
657 blotting of Mff KO cells, the Li-Cor Odyssey CLx system was used (Li-Cor Biotechnology, Lincoln  
658 NE), as well as IRDye-labeled anti-Rabbit and anti-mouse secondary antibodies from the same  
659 company.

660

#### 661 **Acknowledgements:**

662 We would like to thank Mike Ryan for GFP-Fis1, Ayumu Sugiura for advice on organelle  
663 fractionation, Heidi McBride for PEX3-deficient cells, Maya Schuldiner for discussions on TA  
664 proteins, Anna Hatch for editing, and Peter Rocs for being receptive to anything. Supported by  
665 NIH GM069818 and GM106000 to HNH, NIH NS056244 and NS 087908 to SS, NIH P20  
666 GM113132 to the BioMT COBRE and NIH S100D010330 to the Norris Cotton Cancer Center.

667

668 The authors declare no competing financial interests.

669 **Figure Legends**

670

671 **Figure 1. A population of Drp1 associates with ER independently of mitochondria or**  
672 **peroxisomes.**

673 (A) Drp1 distribution in GFP-Drp1 knock-in U2OS cells (GFP-Drp1-KI cells). *Left:* merged image of a  
674 live Drp1 KI cell transiently expressing mCherry-mito3 (red) and eBFP2-peroxisome (blue). Drp1 in  
675 green. *Right:* insets from boxed region at three time points. Yellow arrow denotes independent  
676 Drp1 puncta; blue arrow indicates peroxisome-associated Drp1; red arrow denotes  
677 mitochondrially-associated Drp1. white arrowhead denotes example of Drp1 puncta localizing at  
678 the interface of mitochondrion and peroxisome.

679 (B) Venn diagram of Drp1 distribution in GFP-Drp1-KI cells expressing mitochondrial and peroxisomal  
680 markers. Black circles denote mitochondrially associated Drp1 punctae; blue circles denote  
681 peroxisomal associated Drp1 punctae (Pex); red circles denote independent Drp1 punctae (Ind.).  
682 The percentage of Drp1 punctae in each category is average from 10 consecutive frames with 12 sec  
683 time intervals from whole-cell videos. Five cells measured (10,761 punctae).

684 (C) Four-color imaging of a live Drp1 KI cell expressing mPlum-mito3 (Mito, gray); eBFP2-PMP20  
685 (Peroxisome, blue); and ER-tagRFP (ER, red); Drp1 in green. Yellow arrows denote independent  
686 Drp1 puncta stably associating with ER. Video 1.

687 (D) Time lapse montage showing *de novo* assembly of an independent Drp1 punctum (yellow arrow) on  
688 an ER tubule. Imaging as in panel C.

689 (E) Graph depicting the degree of association between independent Drp1 punctae and ER during 2.5-  
690 min videos imaged every 1.6 sec. 30 ROIs from 25 GFP-Drp1-KI cells analyzed (1003 punctae).  
691 Mean values from ROIs: 76.7%±11.7% stable association between Drp1 punctae and ER (no  
692 apparent dissociation from ER in any frame); 8.9%±9.5% partial association; 14.4%±8.0% no  
693 association.

694 Scale bar, 10  $\mu$ m in whole cell image in (A); 2  $\mu$ m in inset in (A), and in (C)&(D). Time in sec.

695

696 **Figure 2. Transfer of Drp1 punctae from ER to mitochondria.**

697 (A) Three-color time lapse images of live GFP-Drp1-KI cell expressing mCherry-mito7 (mitochondria,  
698 red), eBFP2-PMP20 (peroxisome, blue) and Drp1 in green. An independent Drp1 puncta (yellow  
699 arrow) transfers to a mitochondrion and then translocates along the mitochondrion with no  
700 division in the observation time period. Video 2.

701 (B) Four-color time lapse images of live GFP-Drp1-KI cell expressing mito-BFP(mitochondria, gray),  
702 mPlum-PMP20 (peroxisome, blue), ER-tagRFP (ER, red) and GFP-Drp1 in green. Yellow arrow  
703 denotes an ER-bound Drp1 puncta transferring to mitochondrion. Video 3.

704 (C) Three-color time lapse images of live GFP-Drp1-KI cell expressing mCherry-mito7 (mitochondria,  
705 red), eBFP2-PMP20 (peroxisome, blue) and Drp1 in green. Two Drp1 punctae transfer to  
706 constriction sites, followed by division. Cells treated with ionomycin (4  $\mu$ M) to stimulate  
707 mitochondrial division. Video 4.

708 (D) Four-color time lapse images of live GFP-Drp1-KI cell expressing mito-BFP(mitochondria, red),  
709 mPlum-PMP20 (peroxisome, gray), ER-tagRFP (ER in blue) and GFP-Drp1 in green. Yellow arrow  
710 denotes an independent Drp1 puncta transferring to mitochondrion. Cells treated with ionomycin  
711 (4  $\mu$ M) to stimulate mitochondrial division. Video 5.

712 Scale bar: 2  $\mu$ m in all images. Time in sec.

713

714 **Figure 3. Mff knock-out U2OS cells are deficient in mitochondrial and peroxisomal division.**

715 (A) Western blotting for Mff and other mitochondrial division proteins in control and Mff KO U2OS cells.

716 (B) Immuno-fluorescence of fixed cells stained for peroxisomes (red) and DNA (DAPI, blue). Images on  
717 right are zoomed regions.

- 718 (C) Division rate quantification for both control and Mff KO U2OS cells. For the quantification of  
719 spontaneous division rate, 18 ROIs analyzed for either 12 (control) or 14 (Mff KO) cells. For  
720 quantification of ionomycin-induced division rate, 21 ROIs (control) and 13 ROIs (Mff KO) were  
721 analyzed. \*\*\*  $p < 0.001$  by student t-test.  
722 (D) Live-cell images of control (top) or Mff KO (bottom) U2OS cells transfected with GFP-Drp1 (green)  
723 and mito-RFP (red). Right panels show ROI of selected region (boxed). Raw images shown, except  
724 for the right-most images, which are processed to reveal Drp1 punctae.  
725 Scale bars, 20  $\mu\text{m}$  (left) and 2  $\mu\text{m}$  (right).  
726

727 **Figure 4. A sub-population of Mff localizes to ER.**

- 728 (A) Endogenous Mff localization in a fixed U2OS cell by immuno-fluorescence. Cells labeled with anti-  
729 Tom20 (mitochondria, blue), anti-PMP70 (peroxisomes, gray), anti-Mff (green); and transfected  
730 with ER-TagRFP (ER, red). Left: scrambled siRNA. Right: Mff siRNA. Independent punctae, yellow  
731 arrows.  
732 (B) Graph depicting the percentage of co-localization between independent Mff punctae and ER in U2OS  
733 cells (endogenous Mff). 54 independent Mff punctae were counted from 5 ROIs from 4 cells. Mean  
734 values from ROIs:  $89.3 \pm 6.7\%$  co-localized Mff with ER,  $6.0 \pm 6.1\%$  not co-localized,  $4.8 \pm 7.3\%$   
735 unclear localization.  
736 (C) Live-cell time lapse of GFP-Mff-S (green) in U2OS cell also expressing mCherry-mito3 (gray); eBFP2-  
737 peroxisome (blue); and E2-Crimson-ER (red). Yellow arrows denote independent Mff punctae  
738 associating with ER; blue and gray arrows indicate peroximal and mitochondrial Mff, respectively.  
739 Video 6.  
740 (D) Graph depicting the degree of association between independent GFP-Mff-S punctae and ER from  
741 live-cell videos as in C (2.5 min videos imaged every 1.5 sec). 34 ROIs from 30 U2OS cells analyzed  
742 (441 independent Mff punctae). Mean values from ROIs:  $86.1 \pm 17.1\%$  stably associated Mff  
743 punctae with ER,  $11.0 \pm 16.8\%$  partially associated,  $4.6 \pm 9.4\%$  not associated.  
744 (E) U2OS fractionation. Left: LSP, MSP and HSP are low, medium and high-speed pellets. HSS is high-  
745 speed supernatant. Marker proteins are: ATP synthase, mitochondria; Sec63, ER; and Pmp70,  
746 peroxisomes. Right: sucrose gradient fractionation of the MSS (medium-speed supernatant).  
747 (F) Human PEX3-deficient fibroblast fractionation, similar to U2OS fractionation.  
748 Scale bar, 10  $\mu\text{m}$  in whole cell image in (B); 2  $\mu\text{m}$  in inset in (B) and in (D). Time in sec.  
749

750 **Figure 5. A sub-population of Fis1 localizes to ER.**

- 751 (A) Endogenous Fis1 localization in fixed U2OS cells by immuno-fluorescence. Cells labeled with anti-  
752 Tom20 (mitochondria, blue), anti-PMP70 (peroxisomes, gray), anti-Fis1 (green); and transfected  
753 with ER-TagRFP (ER, red). Left: scrambled siRNA. Right: Fis1 siRNA. Independent punctae, yellow  
754 arrows.  
755 (B) Graph depicting the percentage of co-localization between independent Fis1 punctae and ER in  
756 U2OS cells by immuno-fluorescence (endogenous Fis1). 117 independent Fis1 punctae counted  
757 from 9 ROIs from 4 cells. Mean values from ROIs:  $79.9 \pm 11.3\%$  co-localized Fis1 punctae with ER,  
758  $6.0 \pm 7.4\%$  not co-localized,  $14.1 \pm 10.2\%$  un-clear localization.  
759 (C) Live-cell time lapse of GFP-Fis1 in U2OS cell also expressing mCherry-mito3 (gray); eBFP2-  
760 peroxisome (blue); and E2-Crimson-ER (red). *Right:* individual frames from the time course of  
761 boxed region, showing independent Fis1 punctae associated with ER (yellow arrow) next to a  
762 peroxisome that is positive for Fis1 (blue arrow).  
763 (D) Graph depicting the degree of association between independent GFP-Fis1 punctae and ER from live-  
764 cell videos as in C (2.5 min videos imaged every 1.7 sec). 16 ROIs from 15 U2OS cells (100  
765 independent Fis1 punctae) analyzed. Mean values from ROIs:  $78.8\% \pm 26.9\%$  stably associated  
766 Fis1 punctae with ER,  $11.9 \pm 18.2\%$  partially associated,  $9.2 \pm 14.8\%$  not associated.

767 Scale bar: 10  $\mu\text{m}$  in whole cell image in (A) and (C); 5  $\mu\text{m}$  in inset in (A); 2  $\mu\text{m}$  inset in (C). Time in  
768 sec.

769

770 **Figure 6. Dynamics of Mff on ER.**

771 (A) Independent Mff punctae dynamics (Airyscan microscopy time lapse). Left panel showing merged  
772 image of a live U2OS cell expressing ER-tagRFP (ER, red); GFP-Mff-S (green); eBFP2-Peroxisome  
773 (blue); and mPlum-mito3 (gray). Right panel shows a time lapse series of the inset, with  
774 independent Mff punctum associating with ER then transferring to mitochondrion (yellow arrow).  
775 Blue arrow indicates peroxisomally associated Mff and white arrow denotes mitochondrial Mff.  
776 Scale bar, 2  $\mu\text{m}$  in left panel of, 1  $\mu\text{m}$  in inset. Time in sec. Video 7.

777 (B) Zoom of panel A, showing heterogeneous nature of peroxisomally-associated Mff. Scale bars, 0.5  
778  $\mu\text{m}$  in all images.

779 (C) Dot plot showing diameter of peroxisomal Mff and independent Mff punctae from Airyscan images.  
780 14 peroxisomal Mff ( $0.42 \pm 0.050 \mu\text{m}$ ) and 19 independent Mff punctae ( $0.22 \pm 0.056$ ) analyzed.

781

782

783 **Figure 7. Association between Drp1 and Mff on ER.**

784 (A) Left: Merged confocal image of a live GFP-Drp1-KI cell expressing mito-BFP(gray), eBFP2-  
785 peroxisome (gray), mStrawberry-Mff-S(red) and pLVX-E2-Crimson-ER (blue). Drp1 in green.

786 *Right:* Time lapse confocal images of boxed region show example of a Drp1 puncta maturing from  
787 an independent Mff puncta (yellow arrows). Video 8.

788 (B) Independent Mff punctae in scramble siRNA treated (left) and Drp1 siRNA treated cells (right). *Left:*  
789 merged image of live U2OS cells transiently expressing GFP-Mff-S(Mff, green), eBFP2-PMP20 (Pex,  
790 blue) and mCherry-mito7 (Mito, red). *Right:* insets from boxed regions in whole cell image. Yellow  
791 arrows denote independent Mff punctae.

792 (C) Density of independent Mff punctae in control and Drp1 siRNA-treated U2OS cells, quantified from  
793 live cell images of GFP-Mff as (B). Units, number of independent Mff punctae per  $\mu\text{m}^2$  in the ROI.  
794 368 independent punctae from nine control cell ROIs and 106 punctae from nine Drp1 KD cell ROIs.  
795 \*\*\* denotes p value < 0.0001 by student t-test.

796 (D) Density of independent Mff punctae in control and Drp1 siRNA-treated U2OS cells, quantified from  
797 fixed cell immuno-fluorescence of endogenous Mff. Units, number of Mff punctae per  $\mu\text{m}^2$  in ROI.  
798 643 independent punctae from five control cell ROIs and 153 puncta from seven Drp1 KD cell ROIs.  
799 \*\*\* denotes p value < 0.0005 by student t-test.

800 Scale bar: 10  $\mu\text{m}$  in whole cell images; 2  $\mu\text{m}$  in insets. Time in sec

801

802 **Figure 8. ER-targeted Mff facilitates mitochondrial division**

803 (A) Schematic cartoon of rapamycin-induced Mff recruitment either to OMM (left) or ER (right). "Mff"  
804 refers to the cytoplasmic portion of Mff-S.

805 (B) Dynamics of GFP-Mff-FRB translocation to mitochondria upon rapamycin treatment in Mff KO  
806 cells. Live cell images of cell transfected with AKAP-FKBP12 (red), GFP-Mff-Cyto-FRB (green),  
807 eBFP2-PMP20 (peroxisomes, blue) and mitoBFP (Mitochondria, blue). Rapamycin (final  
808 concentration: 10 $\mu\text{M}$ ) added at time 0.

809 (C) Dynamics of GFP-Mff-Cyto translocation to ER upon rapamycin in rapamycin treatment in Mff KO  
810 cells. Live cell images of cells transfected with Sac1-FKBP12 (ER, blue), GFP-Mff-Cyto-FRB (green),  
811 and mCherry-mito7 (mitochondria, red). The lower green panel represents GFP-MFF-CytoFRB  
812 signal that has been thresholded to remove the cytoplasmic signal. Rapamycin (final  
813 concentration: 10 $\mu\text{M}$ ) added at time 0.



- 814 (D) Rapamycin-induced mitochondrial division rates in control U2OS cells (16 ROIs from 15 cells); Mff  
815 KO cells (21 ROIs from 21 cells) ( $P=0.00001$ , \*\*\*); Mff KO cells transfected with mitochondria-  
816 targeted Mff (34 ROIs from 30 cells) ( $P=0.0179$ ,\*); Mff KO cells transfected with ER-targeted Mff  
817 (20 ROIs from 17 cells) ( $P=0.0049$ ,\*\*\*); or Mff KO cells transfected with both mitochondria- and  
818 ER-targeted Mff (34 ROIs from 30 cells)( $P=0.4181$ ). Statistical analysis based on comparison to  
819 control cells by student t-test.
- 820 (E) Western blot showing Mff and Drp1 expression levels in WT cells, Mff-KO cells, and Mff-KO cells  
821 transfected with either the Mff-FRB construct + the mitochondrially-targeted FKBP12 construct  
822 (Mff KO + Mff-mito) or the Mff-FRB construct + the mitochondrially-targeted FKBP12 construct +  
823 the ER-targeted FKBP12 construct (Mff KO + Mff-ER & Mff-mito). Tubulin and myosin IIA are  
824 loading controls. Endogenous Mff runs as a doublet below 37 kDa, whereas the Mff-FRB construct  
825 runs at the 37 kDa marker.
- 826 Scale bar: 10  $\mu\text{m}$  in whole cell images in (B, C); 2  $\mu\text{m}$  in insets in (B, C). Time in sec.
- 827

828 **Figure 9. Actin-dependent oligomerization of ER-associated Drp1 punctae.**

- 829 (A) Left: merged image of a live GFP-Drp1-KI cell before ionomycin treatment, transiently expressing  
830 mPlum-mito3 (gray), eBFP2-peroxisome (blue), and ER-tagRFP (ER, red). Drp1 in green. Right:  
831 inset from boxed region before (top) and after (bottom) ionomycin treatment (4  $\mu\text{M}$ , 10 min).  
832 Yellow arrows denote independent Drp1 maturing upon ionomycin treatment. Video 9.
- 833 (B) Similar experiment as in A, except cells were pre-treated for 10min with 1  $\mu\text{M}$  LatA. Video 10.
- 834 (C) Quantification of independent Drp1 punctae number in response to vehicle treatment (DMSO),  
835 ionomycin treatment and LatA pre-treatment followed by ionomycin treatment. 6 ROIs from 6  
836 DMSO treated cells, 16 ROIs from 14 ionomycin treated cells, and 8 ROIs from 6 LatA pre-  
837 treated/ionomycin treated cells. Punctae per ROI normalized to 1 at time of ionomycin addition.  
838 Error bar, S.E.M. Arrow indicates time point where ionomycin was added during imaging (time 0).  
839 Scale bar: 10  $\mu\text{m}$  in left panels; 2  $\mu\text{m}$  in right panels. Time in sec.
- 840

841 **Figure 10. Maturation of existing independent Drp1 punctae upon ionomycin stimulation.**

- 842 (A) Two examples of independent Drp1 punctae maturation in response to ionomycin. Time-lapse  
843 images of live GFP-Drp1-KI cell as in Fig. 9A. Time indicates sec after ionomycin treatment.  
844 Fluorescence intensity levels modulated uniformly across timecourse so that final fluorescence is in  
845 linear range (resulting in time 0 fluorescence being undetectable as displayed). Scale bars, 1  $\mu\text{m}$ .  
846 Time in sec.
- 847 (B) Quantification of mean independent Drp1 punctum intensity in un-stimulated or ionomycin treated  
848 conditions. Seven independent Drp1 punctae from un-stimulated cells and eight independent Drp1  
849 punctae from ionomycin treated analyzed. Error bars, S.D.
- 850 (C) Effect of INF2 KD on independent Drp1 punctae in GFP-Drp1-KI cells transfected with mCherry-  
851 mito7 (mitochondria, red) and eBFP2-peroxisome (blue). Drp1 in green. Top is control siRNA,  
852 bottom is INF2 siRNA. *Right*: zoomed images of boxed regions indicated by numbers. Scale bar: 10  
853  $\mu\text{m}$  in left panels; 2  $\mu\text{m}$  in right panels (insets).
- 854 (D) Quantification of independent Drp1 punctae density in control (scrambled siRNA) and INF2 siRNA  
855 cells. 174 independent punctae from seven control cells, 45 independent punctae from nine INF2  
856 siRNA cells. Density expressed as number of independent Drp1 punctae per area of ROI (in  $\mu\text{m}^2$ ).  
857 \*\*\* denotes  $p < 0.001$  by student's t-test.

858 **Supplementary Figure Legends:**

859

860 **Figure S1. Characterization of Drp1 KI U2OS cell, and Drp1-independent punctae in Cos7 cells.**

861 (A) Western blot of U2OS cells and Drp1 KI U2OS cells showing expression level of GFP-Drp1 and un-  
862 tagged Drp1 with two dilutions of extract loaded (1x and 2x dilution).

863 (B) Quantification of un-tagged Drp1 and GFP-Drp1 in WT U2OS and Drp1 KI cells from western blots  
864 (normalized to tubulin level). Error bars, S.D.

865 (C) Cell proliferation assay (Alamar blue). Three replicates taken for each time point (median shown,  
866 with error bars representing minimum and maximum). Starting density: 5000 cells/24-well plate.  
867 Representative result from two independent experiments.

868 (D) Drp1-independent punctae in Cos7 cells. *Left*: merged image of a live COS7 cell transiently  
869 expressing mito-BFP (mitochondria, blue), eBFP2-PMP20 (peroxisome, gray), GFP-Drp1(green)  
870 and ER-TagRFP (ER, red). *Right*: insets from boxed region. Yellow arrows denote independent  
871 Drp1 punctae associating with ER.

872 (E) Graph depicting the degree of association between independent Drp1 punctae and ER in Cos7  
873 cells, during 3 minute movies imaged every 1.5 sec. 175 independent Drp1 puncta were analyzed  
874 from 12 ROIs from 12 cells as shown in A. Stale association 94.2%±7.6%; Partial association  
875 2.5%±4.7%; No association 3.3%±5.4%.

876 Scale bar, 10 μm in whole cell image; 2 μm in inset. Time in sec.

877

878 **Figure S2. Independent Drp1 punctae are not stably associated with endosomal membranes.**

879 (A) Merged image of GFP-Drp1-KI cell expressing mCherry-mito3 (red); eBFP2-peroxisome (blue);  
880 and treated with transferrin-Alex647 (endosomes, gray). GFP-Drp1 in green.

881 (B) Graph depicting degree of association between independent Drp1 punctae and transferrin-labeled  
882 membranes during 3 min videos imaged every 1.7 sec. 10 ROIs from 10 cells, 342 Drp1 punctae.

883 (C) Time-lapse of inset from (A) showing independent Drp1 punctae distinct from transferrin-labeled  
884 endosomes. White arrows denote endosomes, yellow arrow denotes independent Drp1 puncta.

885 (D) Time-lapse ROI of a GFP-Drp1-KI cell expressing mStrawberry-Rab4b (red), and ER-eBFP2 (ER,  
886 green). Drp1 in blue. Arrows defined as in C.

887 (E) Graph depicting the degree of association between independent Drp1 punctae and Rab4b-labeled  
888 membranes during 3 min videos imaged every 1.8 sec. 10 ROIs from 10 cells, 152 Drp1 punctae.

889 (F) Time-lapse of a Drp1 KI cell expressing mStrawberry-Rab7a (red), and ER-eBFP2 (ER, green).  
890 GFP-Drp1 is blue. Arrows defined as in C.

891 (G) Graph depicting the degree of association between independent Drp1 punctae and Rab7a labeled  
892 membranes during 3 min videos imaged every 1.5 sec. 10 ROIs from 10 cells, 177 Drp1 punctae.

893 Scale bar, 10 μm in (A); 5 μm in (C); 2 μm in (D) and (F). Time in sec.

894

895 **Figure S3. Independent Drp1 punctae do not associate with Tom20.**

896 (A) GFP-Drp1-KI cells transiently transfected with Tom20-mCherry (red) and eBFP2-PMP20  
897 (peroxisomes, blue). Drp1 in green. Whole cell overlay on left, and time course of the indicated  
898 ROI on right (top, Tom20 alone. Bottom, merged image).

899 (B) Zoom of indicated region of 0 sec time point in A, showing Drp1 and Tom20. No peroxisomes  
900 detected in this region. Yellow arrow denotes independent Drp1 puncta with no associated  
901 Tom20 signal.

902 (C) Graph of percentage of independent Drp1 puncta overlaying with Tom20 (16 independent puncta  
903 from five ROI analyzed). One instance of overlap observed in ROI 4.

904 Scale bar, 10 μm in whole cell in (A), 2 μm in inset in (A), 1 μm in (B). Time in sec.

905

906

907 **Figure S4. Experiments to test Drp1 aggregation.**

- 908 (A) Endogenous Drp1 staining by immunofluorescence in WT (top) and Drp1 KD U2OS cells (bottom).  
909 Also stained are mitochondria (blue), peroxisomes (gray) and ER (red). Yellow arrows indicate  
910 independent Drp1 puncta. WT and KD images acquired and processed identically.  
911 (B) Quantification of co-localization between endogenous Drp1 punctae and ER in WT U2OS cells. 562  
912 independent puncta counted from 16 cells. Co-localized: 85.5%±9.7%; Not co-localized:  
913 10.0%±7.3%; Unclear: 4.6%±9.4%.  
914 (C) Comparison of GFP-Drp1 distribution in U2OS cells under three conditions: GFP-Drp1-KI cells  
915 transfected with a scrambled siRNA (left), siRNA for Mff (center), and U2OS cells over-expressing  
916 GFP-Drp1 dimer or monomer mutant (right). Top row represents raw images and bottom row  
917 shows processed images to reveal Drp1 punctae, as described in methods (background subtracted  
918 and smoothed using imagej).  
919 Scale bar, 10 µm in whole cell images in A and in C, 2µm in zoomed images in A.

920

921 **Figure S5. siRNA treatments for Mff and Fis1 in U2OS cells.**

- 922 (A) Western blots showing effectiveness of siRNA against Mff and Fis1.  
923 (B) Division rate quantification for scrambled siRNA and Mff siRNA in GFP-Drp1-KI U2OS cells, in both  
924 the unstimulated and ionomycin-stimulated states. In quantification of spontaneous division, 18  
925 scrambled siRNA cells and 17 Mff siRNA cells are analyzed. In quantification of ionomycin induced  
926 division, 30 scrambled siRNA cells and 32 Mff siRNA cells are analyzed. \*\*\*, P<0.005, unpaired  
927 student t test.  
928 (C) Mitochondrial Drp1 punctae density quantification (units, Drp1 puncta per µm) for scrambled  
929 siRNA and Mff siRNA in GFP-Drp1-KI U2OS cells. 24 ROIs from 20 control cells and 27 ROIs from 25  
930 MFF KD cells are analyzed. \*\*\*, P<0.005, unpaired student t test.

931

932 **Figure S6. The Mff-L isoform displays ER-associated punctae, while Mid51 does not localize to**  
933 **ER.**

- 934 (A) Time-lapse from region of U2OS cell expressing mCherry-mito3 (red); eBFP2-peroxisome (blue);  
935 GFP-Mff-L (green); and E2-Crimson-ER (gray). Yellow arrow denotes independent Mff puncta  
936 associating with ER tubules.  
937 (B) Graph depicting the degree of association between independent Mff-L punctae and ER during 3  
938 min videos imaged every 2 sec. 10 ROIs from 8 U2OS cells, 167 independent Mff punctae.  
939 (C) GFP-Mid51 does not display ER-associated punctae independent of mitochondria. Left panel:  
940 merged image of a live cell expressing Mid51-GFP (green), mitoBFP (blue) and ER-tagRFP (ER,  
941 red). *Right*: insets.  
942 Scale bar, 2 µm in A; 10 µm in whole cell in C, and 5 µm in inset of C. Time in sec.

943

944



945 **Video legends**

946 **Video 1:** Confocal time-lapse of independent Drp1 puncta stably associating with ER tubules (yellow  
947 arrow) in GFP-Drp1-KI cell transiently expressing mPlum-mito3 (gray), eBFP2-PMP20 (blue) and ER-  
948 tagRFP (red). Drp1 in green. Left: without ER. Right: with ER. Time lapse taken in single z-plane  
949 every 1.77 sec. Time min:sec. Bar, 2 $\mu$ m. (Fig. 1C)

950  
951 **Video 2.** Confocal time-lapse of independent Drp1 puncta transferring to mitochondria in GFP-Drp1-KI  
952 U2OS cells transiently expressing mCherry-mito-7 (mitochondria, red), and eBFP2-PMP20 (peroxisome,  
953 blue). Time lapse taken in single z-plane in dorsal region of cell every 2.1 sec. Time min:sec. Bar, 2 $\mu$ m.  
954 (Fig. 2A)

955  
956 **Video 3.** Confocal time-lapse of independent Drp1 puncta transferring from ER to mitochondria in GFP-  
957 Drp1-KI U2OS cells transiently expressing mito-BFP (Mito in red), mPlum-PMP20 (Pex in gray), and ER-  
958 tagRFP (ER in blue). Time lapse taken in single z-plane in dorsal region of cell every 3 sec. Left: Drp1  
959 only. Middle: without ER. Right: with ER. Time min:sec. Bar, 2 $\mu$ m. (Fig. 2B)

960  
961 **Video 4.** Confocal time-lapse of independent Drp1 puncta transferring to mitochondria, followed by  
962 mitochondrial division, in GFP-Drp1-KI U2OS cells transiently expressing mCherry-mito-7 (Mito in red),  
963 and eBFP2-PMP20 (Pex in blue). Time lapse taken in single z-plane in dorsal region of cell every 1.5 sec.  
964 Cells were treated with ionomycin (4  $\mu$ M) to stimulate division at time 0. Time min:sec. Bar, 2 $\mu$ m. (Fig.  
965 2C)

966  
967 **Video 5.** Confocal time-lapse of independent Drp1 puncta transferring from ER to mitochondria,  
968 followed by mitochondrial division, in GFP-Drp1-KI U2OS cells transiently expressing mito-BFP (Mito in  
969 red), mPlum-PMP20 (Pex in gray), and ER-tagRFP (ER in blue). Time lapse taken in single z-plane in  
970 dorsal region of cell every 3 sec. Left: without ER. Right: with ER. Cells were treated with ionomycin (4  
971  $\mu$ M) to stimulate division at time 0. Time min:sec. Bar, 2 $\mu$ m. (Fig. 2D)

972  
973 **Video 6:** Confocal time-lapse of independent Mff punctae on ER in U2OS cell transiently expressing  
974 mCherry-mito7 (gray), GFP-Mff-S (green), eBFP2-peroxisome (blue) and ER-E2-Crimson (Red). Time  
975 lapse was taken in single z-plane every 1.8 sec. Time min:sec. Bar, 2 $\mu$ m. (Fig. 4C)

976  
977 **Video 7:** Airyscan time-lapse of independent Mff punctum transfer from ER to mitochondrion in U2OS  
978 cell transiently expressing mPlum-mito-3 (gray), GFP-Mff-S (green), eBFP2-PMP20 (blue) and ER-  
979 tagRFP (red). Left: without ER. Right: with ER. White arrow denotes independent Mff. Yellow arrow  
980 denotes peroxisome-associated Mff. Taken in single z-plane every 24 sec. Time min:sec. Bar, 2 $\mu$ m. (Fig. 6  
981 A)

982  
983 **Video 8:** Confocal time-lapse of Drp1 appearance and maturation at Mff-enriched site on ER in a GFP-  
984 Drp1-KI cell transiently expressing mito-BFP (blue), eBFP2-PMP20 (blue), mStrawberry-Mff-S (red),  
985 and ER-E2-Crimson (white). Drp1 in green. Left: Mff only. Middle: Drp1 only. Right: both Mff and  
986 Drp1. Time lapse was taken every 1.7 sec. Time min:sec. Bar, 2 $\mu$ m. (Fig. 7 A)

987  
988 **Video 9:** Confocal time-lapse of Drp1 oligomerization upon ionomycin treatment in GFP-Drp1-KI U2OS  
989 cell transiently expressing mPlum-mito-3 (gray), eBFP2-PMP20 (blue) and ER-tagRFP (red). Drp1 in  
990 green. Left: Drp1 only. Right: Drp1 Mito Pex with ER. Taken in single z-plane in every 23 sec. Time  
991 min:sec. Ionomycin treatment at 1:30. Bar, 2 $\mu$ m. (Fig 9 A)

992  
993 **Video 10:** Confocal time-lapse of Drp1 oligomerization after LatA (1 $\mu$ M, 10min) pre-treatment followed  
994 by ionomycin treatment (4 $\mu$ M) in Drp1 KI U2OS cell transiently expressing mPlum-mito-3 (gray),  
995 eBFP2-peroxisome (blue) and ER-tagRFP (Red). Left: Drp1 only. Right: Drp1 Mito Pex with ER. Time  
996 lapse was taken in single z-plane in every 23.6 sec. Time min:sec. Ionomycin treatment at 1:34. Bar,  
997 2 $\mu$ m. (Fig 9 B)

998 **References:**

- 999
- 1000 Aviram, N., T. Ast, E.A. Costa, E.C. Arakel, S.G. Chuartzman, C.H. Jan, S. Hassdenteufel, J. Dudek, M.  
1001 Jung, S. Schorr, R. Zimmermann, B. Schwappach, J.S. Weissman, and M. Schuldiner. 2016.  
1002 The SND proteins constitute an alternative targeting route to the endoplasmic reticulum.  
1003 *Nature*. 540:134-138.
- 1004 Bui, H.T., and J.M. Shaw. 2013. Dynamin assembly strategies and adaptor proteins in  
1005 mitochondrial fission. *Current biology : CB*. 23:R891-899.
- 1006 Bustillo-Zabalbeitia, I., S. Montessuit, E. Raemy, G. Basanez, O. Terrones, and J. C. Martinou.  
1007 2014. Specific interaction with cardiolipin triggers functional activation of dynamin-  
1008 related protein 1. *PLOS One*. 9(7): e102738.
- 1009 Chang, C.R., and C. Blackstone. 2007. Drp1 phosphorylation and mitochondrial regulation.  
1010 *EMBO reports*. 8:1088-1089; author reply 1089-1090.
- 1011 Chang, C.R., and C. Blackstone. 2010. Dynamic regulation of mitochondrial fission through  
1012 modification of the dynamin-related protein Drp1. *Annals of the New York Academy of*  
1013 *Sciences*. 1201:34-39.
- 1014 Chhabra, E.S., V. Ramabhadran, S.A. Gerber, and H.N. Higgs. 2009. INF2 is an endoplasmic  
1015 reticulum-associated formin protein. *Journal of cell science*. 122:1430-1440.
- 1016 Clayton, D.A., and G.S. Shadel. 2014. Isolation of mitochondria from tissue culture cells. *Cold*  
1017 *Spring Harbor protocols*. 2014:pdb prot080002.
- 1018 Cribbs, J.T., and S. Strack. 2007. Reversible phosphorylation of Drp1 by cyclic AMP-dependent  
1019 protein kinase and calcineurin regulates mitochondrial fission and cell death. *EMBO*  
1020 *reports*. 8:939-944.
- 1021 Csordas, G., P. Varnai, T. Golenar, S. Roy, G. Purkins, T.G. Schneider, T. Balla, and G. Hajnoczky.  
1022 2010. Imaging interorganelle contacts and local calcium dynamics at the ER-  
1023 mitochondrial interface. *Mol Cell*. 39:121-132.
- 1024 De Vos, K.J., V.J. Allan, A.J. Grierson, and M.P. Sheetz. 2005. Mitochondrial function and actin  
1025 regulate dynamin-related protein 1-dependent mitochondrial fission. *Current biology :*  
1026 *CB*. 15:678-683.
- 1027 Denic, V., V. Dotsch, and I. Sinning. 2013. Endoplasmic reticulum targeting and insertion of tail-  
1028 anchored membrane proteins by the GET pathway. *Cold Spring Harbor perspectives in*  
1029 *biology*. 5:a013334.
- 1030 DuBoff, B., M. Feany, and J. Gotz. 2013. Why size matters - balancing mitochondrial dynamics in  
1031 Alzheimer's disease. *Trends in neurosciences*. 36:325-335.
- 1032 Duboff, B., J. Gotz, and M.B. Feany. 2012. Tau Promotes Neurodegeneration via DRP1  
1033 Mislocalization In Vivo. *Neuron*. 75:618-632.
- 1034 Friedman, J.R., L.L. Lackner, M. West, J.R. DiBenedetto, J. Nunnari, and G.K. Voeltz. 2011. ER  
1035 tubules mark sites of mitochondrial division. *Science*. 334:358-362.
- 1036 Frohlich, C., S. Grabiger, D. Schwefel, K. Faelber, E. Rosenbaum, J. Mears, O. Rocks, and O.  
1037 Daumke. 2013. Structural insights into oligomerization and mitochondrial remodelling  
1038 of dynamin 1-like protein. *The EMBO journal*. 32:1280-1292.
- 1039 Gandre-Babbe, S., and A.M. van der Bliek. 2008. The novel tail-anchored membrane protein Mff  
1040 controls mitochondrial and peroxisomal fission in mammalian cells. *Mol Biol Cell*.  
1041 19:2402-2412.
- 1042 Hatch, A.L., P.S. Gurel, and H.N. Higgs. 2014. Novel roles for actin in mitochondrial fission.  
1043 *Journal of cell science*. 127:4549-4560.

- 1044 Hatch, A.L., W.K. Ji, R.A. Merrill, S. Strack, and H.N. Higgs. 2016. Actin filaments as dynamic  
1045 reservoirs for Drp1 recruitment. *Mol Biol Cell*. 27(20): 3109-3121.
- 1046 Horie, C., H. Suzuki, M. Sakaguchi, and K. Mihara. 2002. Characterization of signal that directs  
1047 C-tail-anchored proteins to mammalian mitochondrial outer membrane. *Mol Biol Cell*.  
1048 13(5): 1615-1625.
- 1049 Hung, V., S.S. Lam, N.D. Udeshi, T. Svinkina, G. Guzman, V.K. Mootha, S.A. Carr, and A.Y. Ting.  
1050 2017. Proteomic mapping of cytosol-facing outer mitochondrial and ER membranes in  
1051 living human cells by proximity biotinylation. *eLife*. 6.
- 1052 Ji, W.K., A.L. Hatch, R.A. Merrill, S. Strack, and H.N. Higgs. 2015. Actin filaments target the  
1053 oligomeric maturation of the dynamin GTPase Drp1 to mitochondrial fission sites. *Elife*.  
1054 4:e11553.
- 1055 Kobayashi, S., A. Tanaka, and Y. Fujiki. 2007. Fis1, DLP1, and Pex11p coordinately regulate  
1056 peroxisome morphogenesis. *Experimental cell research*. 313:1675-1686.
- 1057 Koch, A., Y. Yoon, N.A. Bonekamp, M.A. McNiven, and M. Schrader. 2005. A role for Fis1 in both  
1058 mitochondrial and peroxisomal fission in mammalian cells. *Mol Biol Cell*. 16:5077-5086.
- 1059 Koch, J., and C. Brocard. 2012. PEX11 proteins attract Mff and human Fis1 to coordinate  
1060 peroxisomal fission. *Journal of cell science*. 125:3813-3826.
- 1061 Korobova, F., T.J. Gauvin, and H.N. Higgs. 2014. A role for myosin II in mammalian  
1062 mitochondrial fission. *Current biology : CB*. 24:409-414.
- 1063 Korobova, F., V. Ramabhadran, and H.N. Higgs. 2013. An actin-dependent step in mitochondrial  
1064 fission mediated by the ER-associated formin INF2. *Science*. 339:464-467.
- 1065 Krumpe, K., I. Frumkin, Y. Herzig, N. Rimon, C. Ozbalci, B. Brugger, D. Rapaport, and M.  
1066 Schuldiner. 2012. Ergosterol content specifies targeting of tail-anchored proteins to  
1067 mitochondrial outer membranes. *Mol Biol Cell*. 23:3927-3935.
- 1068 Labbe, K., A. Murley, and J. Nunnari. 2014. Determinants and functions of mitochondrial  
1069 behavior. *Annual review of cell and developmental biology*. 30:357-391.
- 1070 Lam, S.K., N. Yoda, and R. Schekman. 2010. A vesicle carrier that mediates peroxisome protein  
1071 traffic from the endoplasmic reticulum. *Proceedings of the National Academy of Sciences  
1072 of the United States of America*. 107:21523-21528.
- 1073 Lee, J.E., L.M. Westrate, H. Wu, C. Page, and G.K. Voeltz. 2016. Multiple dynamin family members  
1074 collaborate to drive mitochondrial division. *Nature*. 540:139-143.
- 1075 Lewis, S.C., L.F. Uchiyama, and J. Nunnari. 2016. ER-mitochondria contacts couple mtDNA  
1076 synthesis with mitochondrial division in human cells. *Science*. 353:aaf5549.
- 1077 Li, S., S. Xu, B.A. Roelofs, L. Boyman, W.J. Lederer, H. Sesaki, and M. Karbowski. 2015. Transient  
1078 assembly of F-actin on the outer mitochondrial membrane contributes to mitochondrial  
1079 fission. *J Cell Biol*. 208:109-123.
- 1080 Liu, R., and D.C. Chan. 2015. The mitochondrial fission receptor Mff selectively recruits  
1081 oligomerized Drp1. *Mol Biol Cell*. 26:4466-4477.
- 1082 Loson, O.C., Z. Song, H. Chen, and D.C. Chan. 2013. Fis1, Mff, MiD49, and MiD51 mediate Drp1  
1083 recruitment in mitochondrial fission. *Mol Biol Cell*. 24:659-667.
- 1084 Macdonald, P. J., N. Stepanyants, N. Mehrotra, J. A. Mears, X. Qi, H. Sesaki, and R. Ramachandran.  
1085 2014. A dimeric equilibrium intermediate nucleates Drp1 reassembly on mitochondrial  
1086 membranes. *Mol Biol Cell*. 25(12): 1905-1915.
- 1087 Manor, U., S. Bartholomew, G. Golani, E. Christenson, M. Kozlov, H. Higgs, J. Spudich, and J.  
1088 Lippincott-Schwartz. 2015. A mitochondria-anchored isoform of the actin-nucleating  
1089 spire protein regulates mitochondrial division. *Elife*. 4.

- 1090 Mateja, A., M. Paduch, H.Y. Chang, A. Szydlowska, A.A. Kossiakoff, R.S. Hegde, and R.J. Keenan.  
1091 2015. Protein targeting. Structure of the Get3 targeting factor in complex with its  
1092 membrane protein cargo. *Science*. 347:1152-1155.
- 1093 Matsui, T., T. Itoh, and M. Fukuda. 2011. Small GTPase Rab12 regulates constitutive degradation  
1094 of transferrin receptor. *Traffic*. 12:1432-1443.
- 1095 Mishra, P., and D.C. Chan. 2016. Metabolic regulation of mitochondrial dynamics. *J Cell Biol*.  
1096 212:379-387.
- 1097 Moore, A.S., Y.C. Wong, C.L. Simpson, and E.L. Holzbaur. 2016. Dynamic actin cycling through  
1098 mitochondrial subpopulations locally regulates the fission-fusion balance within  
1099 mitochondrial networks. *Nature communications*. 7:12886.
- 1100 Nunnari, J., and A. Suomalainen. 2012. Mitochondria: in sickness and in health. *Cell*. 148:1145-  
1101 1159.
- 1102 Osellame, L.D., A.P. Singh, D.A. Stroud, C.S. Palmer, D. Stojanovski, R. Ramachandran, and M.T.  
1103 Ryan. 2016. Cooperative and independent roles of the Drp1 adaptors Mff, MiD49 and  
1104 MiD51 in mitochondrial fission. *Journal of cell science*. 129:2170-2181.
- 1105 Otera, H., N. Miyata, O. Kuge, and K. Mihara. 2016. Drp1-dependent mitochondrial fission via  
1106 MiD49/51 is essential for apoptotic cristae remodeling. *J Cell Biol*. 212:531-544.
- 1107 Otera, H., C. Wang, M.M. Cleland, K. Setoguchi, S. Yokota, R.J. Youle, and K. Mihara. 2010. Mff is  
1108 an essential factor for mitochondrial recruitment of Drp1 during mitochondrial fission in  
1109 mammalian cells. *J Cell Biol*. 191:1141-1158.
- 1110 Palmer, C.S., K.D. Elgass, R.G. Parton, L.D. Osellame, D. Stojanovski, and M.T. Ryan. 2013.  
1111 Adaptor proteins MiD49 and MiD51 can act independently of Mff and Fis1 in Drp1  
1112 recruitment and are specific for mitochondrial fission. *The Journal of biological  
1113 chemistry*. 288:27584-27593.
- 1114 Pernas, L., and L. Scorrano. 2016. Mito-Morphosis: Mitochondrial Fusion, Fission, and Cristae  
1115 Remodeling as Key Mediators of Cellular Function. *Annual review of physiology*. 78:505-  
1116 531.
- 1117 Pitts, K.R., Y. Yoon, E.W. Krueger, and M.A. McNiven. 1999. The dynamin-like protein DLP1 is  
1118 essential for normal distribution and morphology of the endoplasmic reticulum and  
1119 mitochondria in mammalian cells. *Mol Biol Cell*. 10:4403-4417.
- 1120 Ramabhadran, V., F. Korobova, G.J. Rahme, and H.N. Higgs. 2011. Splice variant-specific cellular  
1121 function of the formin INF2 in maintenance of Golgi architecture. *Mol Biol Cell*. 22:4822-  
1122 4833.
- 1123 Ramachandran, R. 2017. Mitochondrial dynamics: the dynamin superfamily and execution by  
1124 collusion. *Sem Cell Dev Biol*. 17: 30365-30368.
- 1125 Richter, V., A.P. Singh, M. Kvensakul, M.T. Ryan, and L.D. Osellame. 2015. Splitting up the  
1126 powerhouse: structural insights into the mechanism of mitochondrial fission. *Cellular  
1127 and molecular life sciences : CMLS*. 72:3695-3707.
- 1128 Ruan, L., C. Zhou, E. Jin, A. Kucharavy, Y. Zhang, Z. Wen, L. Florens, and R. Li. 2017. Cytosolic  
1129 proteostasis through importing of misfolded proteins into mitochondria. *Nature*.  
1130 543:443-446.
- 1131 Schrader, M., J.L. Costello, L.F. Godinho, A.S. Azadi, and M. Islinger. 2016. Proliferation and  
1132 fission of peroxisomes - An update. *Biochimica et biophysica acta*. 1863:971-983.
- 1133 Schuldiner, M., S.R. Collins, N.J. Thompson, V. Denic, A. Bhamidipati, T. Punna, J. Ihmels, B.  
1134 Andrews, C. Boone, J.F. Greenblatt, J.S. Weissman, and N.J. Krogan. 2005. Exploration of



- 1135 the function and organization of the yeast early secretory pathway through an epistatic  
1136 miniarray profile. *Cell*. 123:507-519.
- 1137 Schuldiner, M., J. Metz, V. Schmid, V. Denic, M. Rakwalska, H.D. Schmitt, B. Schwappach, and J.S.  
1138 Weissman. 2008. The GET complex mediates insertion of tail-anchored proteins into the  
1139 ER membrane. *Cell*. 134:634-645.
- 1140 Shen, Q., K. Yamano, B.P. Head, S. Kawajiri, J.T. Cheung, C. Wang, J.H. Cho, N. Hattori, R.J. Youle,  
1141 and A.M. van der Bliek. 2014. Mutations in Fis1 disrupt orderly disposal of defective  
1142 mitochondria. *Mol Biol Cell*. 25:145-159.
- 1143 Soubannier, V., P. Rippstein, B.A. Kaufman, E.A. Shoubridge, and H.M. McBride. 2012.  
1144 Reconstitution of mitochondria derived vesicle formation demonstrates selective  
1145 enrichment of oxidized cargo. *PLoS one*. 7:e52830.
- 1146 Stefanovic, S., and R.S. Hegde. 2007. Identification of a targeting factor for posttranslational  
1147 membrane protein insertion into the ER. *Cell*. 128:1147-1159.
- 1148 Stojanovski, D., O.S. Koutsopoulos, K. Okamoto, and M.T. Ryan. 2004. Levels of human Fis1 at  
1149 the mitochondrial outer membrane regulate mitochondrial morphology. *Journal of cell  
1150 science*. 117:1201-1210.
- 1151 Sugiura, A., S. Mattie, J. Prudent, and H.M. McBride. 2017. Newly born peroxisomes are a hybrid  
1152 of mitochondrial and ER-derived pre-peroxisomes. *Nature*. 542:251-254.
- 1153 Toyama, E.Q., S. Herzig, J. Courchet, T.L. Lewis, Jr., O.C. Loson, K. Hellberg, N.P. Young, H. Chen, F.  
1154 Polleux, D.C. Chan, and R.J. Shaw. 2016. Metabolism. AMP-activated protein kinase  
1155 mediates mitochondrial fission in response to energy stress. *Science*. 351:275-281.
- 1156 Vafai, S.B., and V.K. Mootha. 2012. Mitochondrial disorders as windows into an ancient  
1157 organelle. *Nature*. 491:374-383.
- 1158 van der Zand, A., I. Braakman, and H.F. Tabak. 2010. Peroxisomal membrane proteins insert  
1159 into the endoplasmic reticulum. *Mol Biol Cell*. 21:2057-2065.
- 1160 Yagita, Y., T. Hiromasa, and Y. Fujiki. 2013. Tail-anchored PEX26 targets peroxisomes via a  
1161 PEX19-dependent and TRC40-independent class I pathway. *J Cell Biol*. 200:651-666.
- 1162 Yoon, Y., E.W. Krueger, B.J. Oswald, and M.A. McNiven. 2003. The mitochondrial protein hFis1  
1163 regulates mitochondrial fission in mammalian cells through an interaction with the  
1164 dynamin-like protein DLP1. *Molecular and cellular biology*. 23:5409-5420.
- 1165 Yoon, Y., K.R. Pitts, S. Dahan, and M.A. McNiven. 1998. A novel dynamin-like protein associates  
1166 with cytoplasmic vesicles and tubules of the endoplasmic reticulum in mammalian cells.  
1167 *J Cell Biol*. 140:779-793.
- 1168 Youle, R.J., and A.M. van der Bliek. 2012. Mitochondrial fission, fusion, and stress. *Science*.  
1169 337:1062-1065.
- 1170 Zhou, C., B.D. Slaughter, J.R. Unruh, F. Guo, Z. Yu, K. Mickey, A. Narkar, R.T. Ross, M. McClain, and  
1171 R. Li. 2014. Organelle-based aggregation and retention of damaged proteins in  
1172 asymmetrically dividing cells. *Cell*. 159:530-542.
- 1173
- 1174

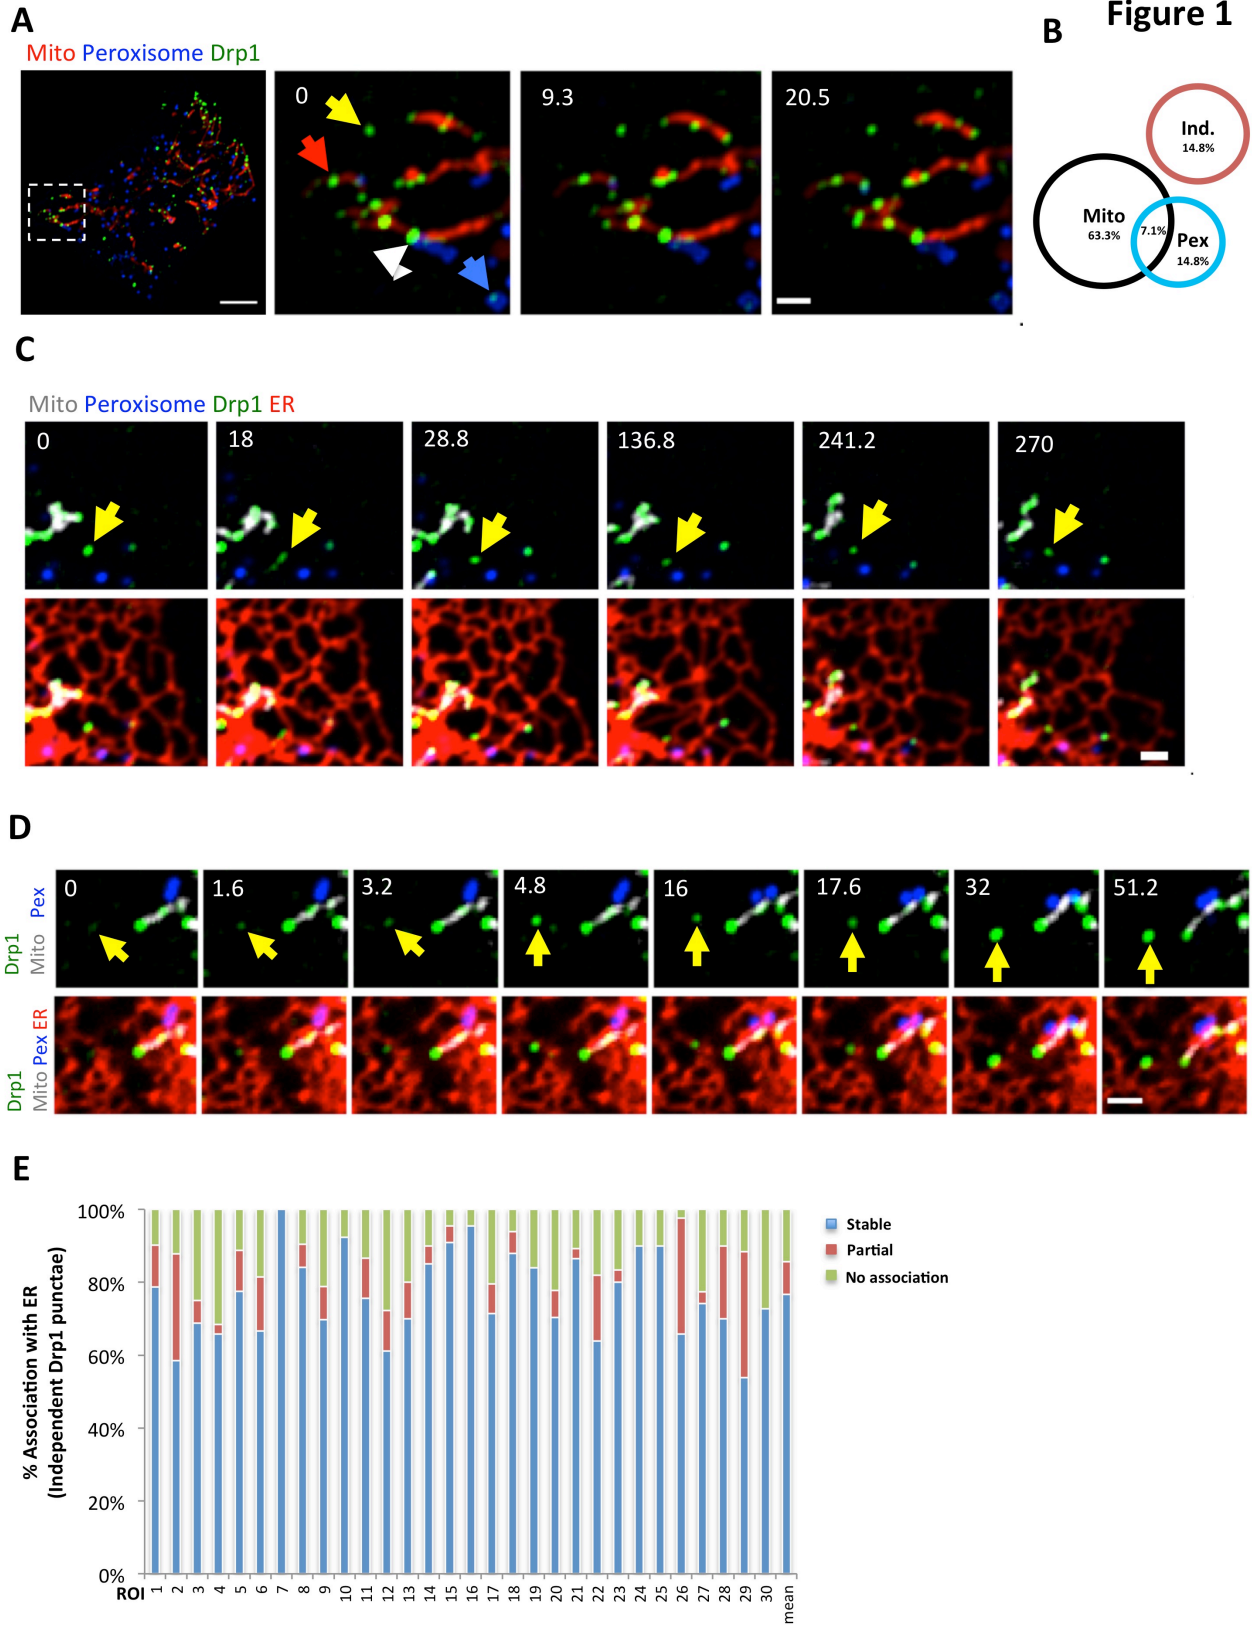

Figure 2

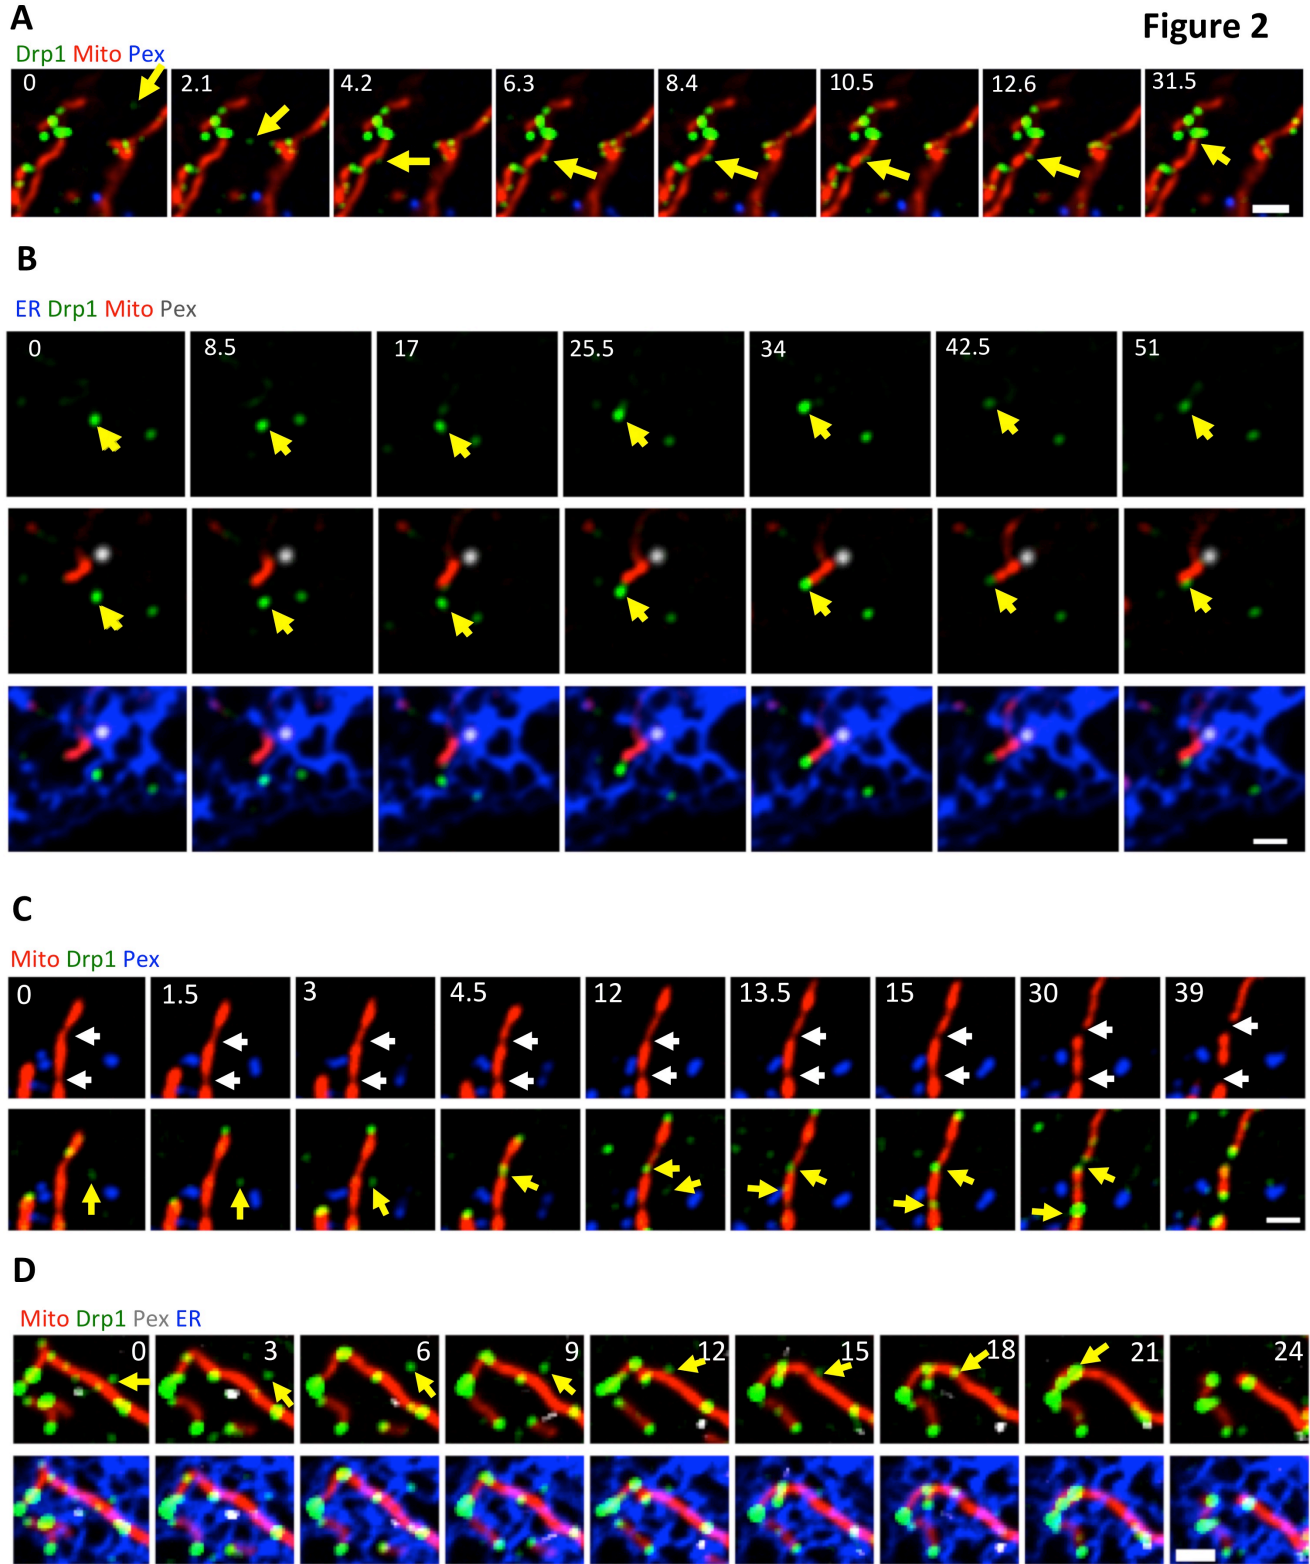

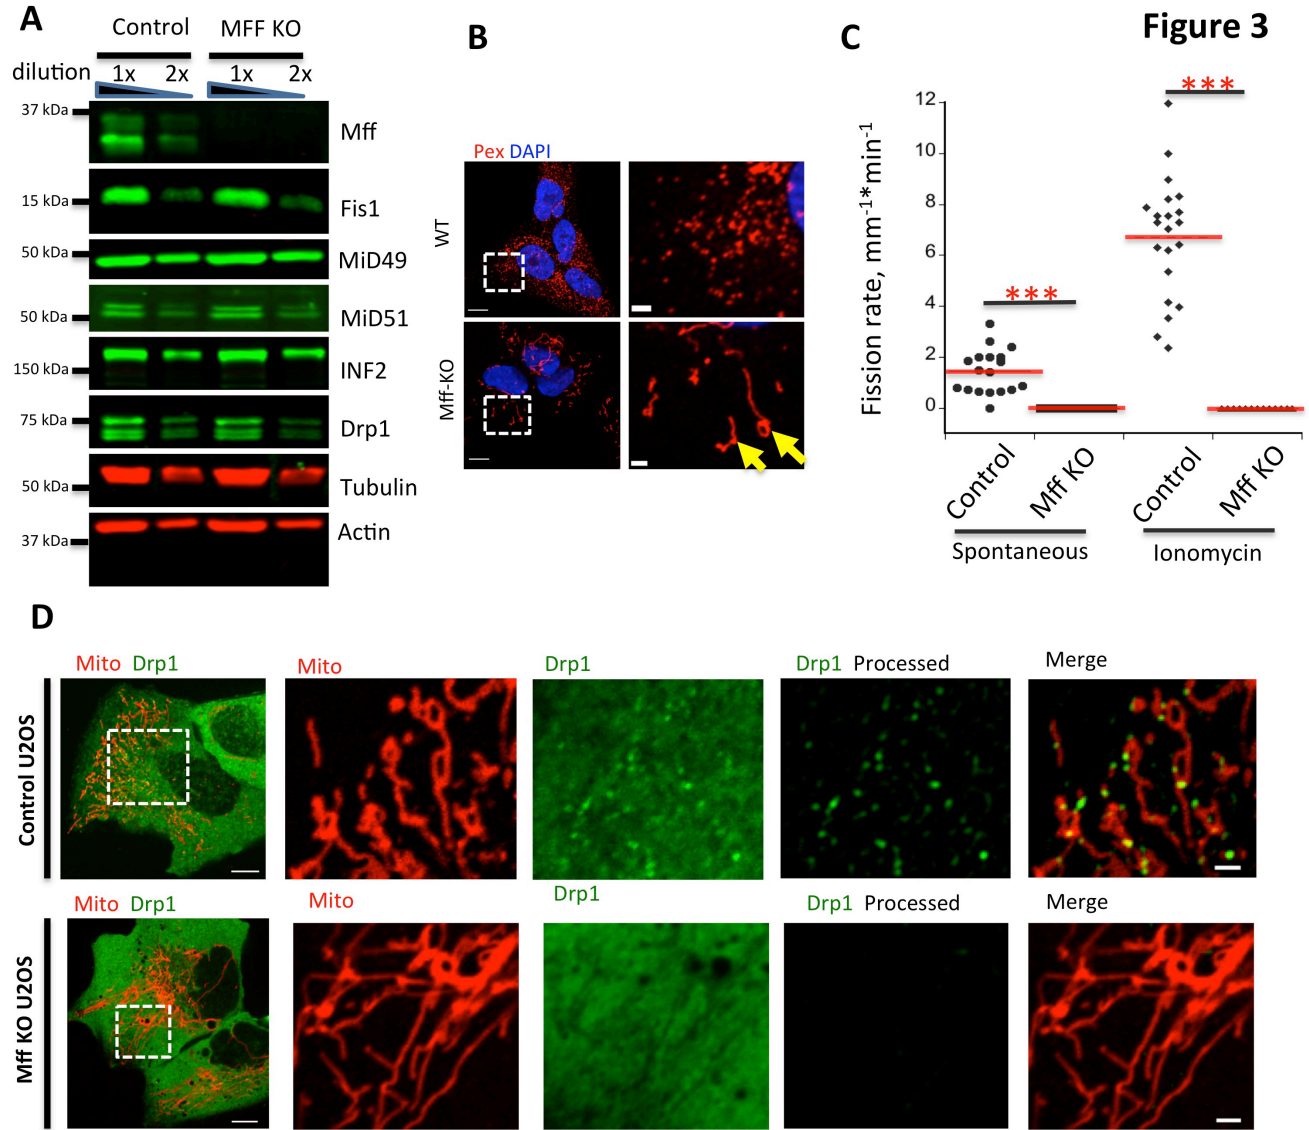



Figure 4

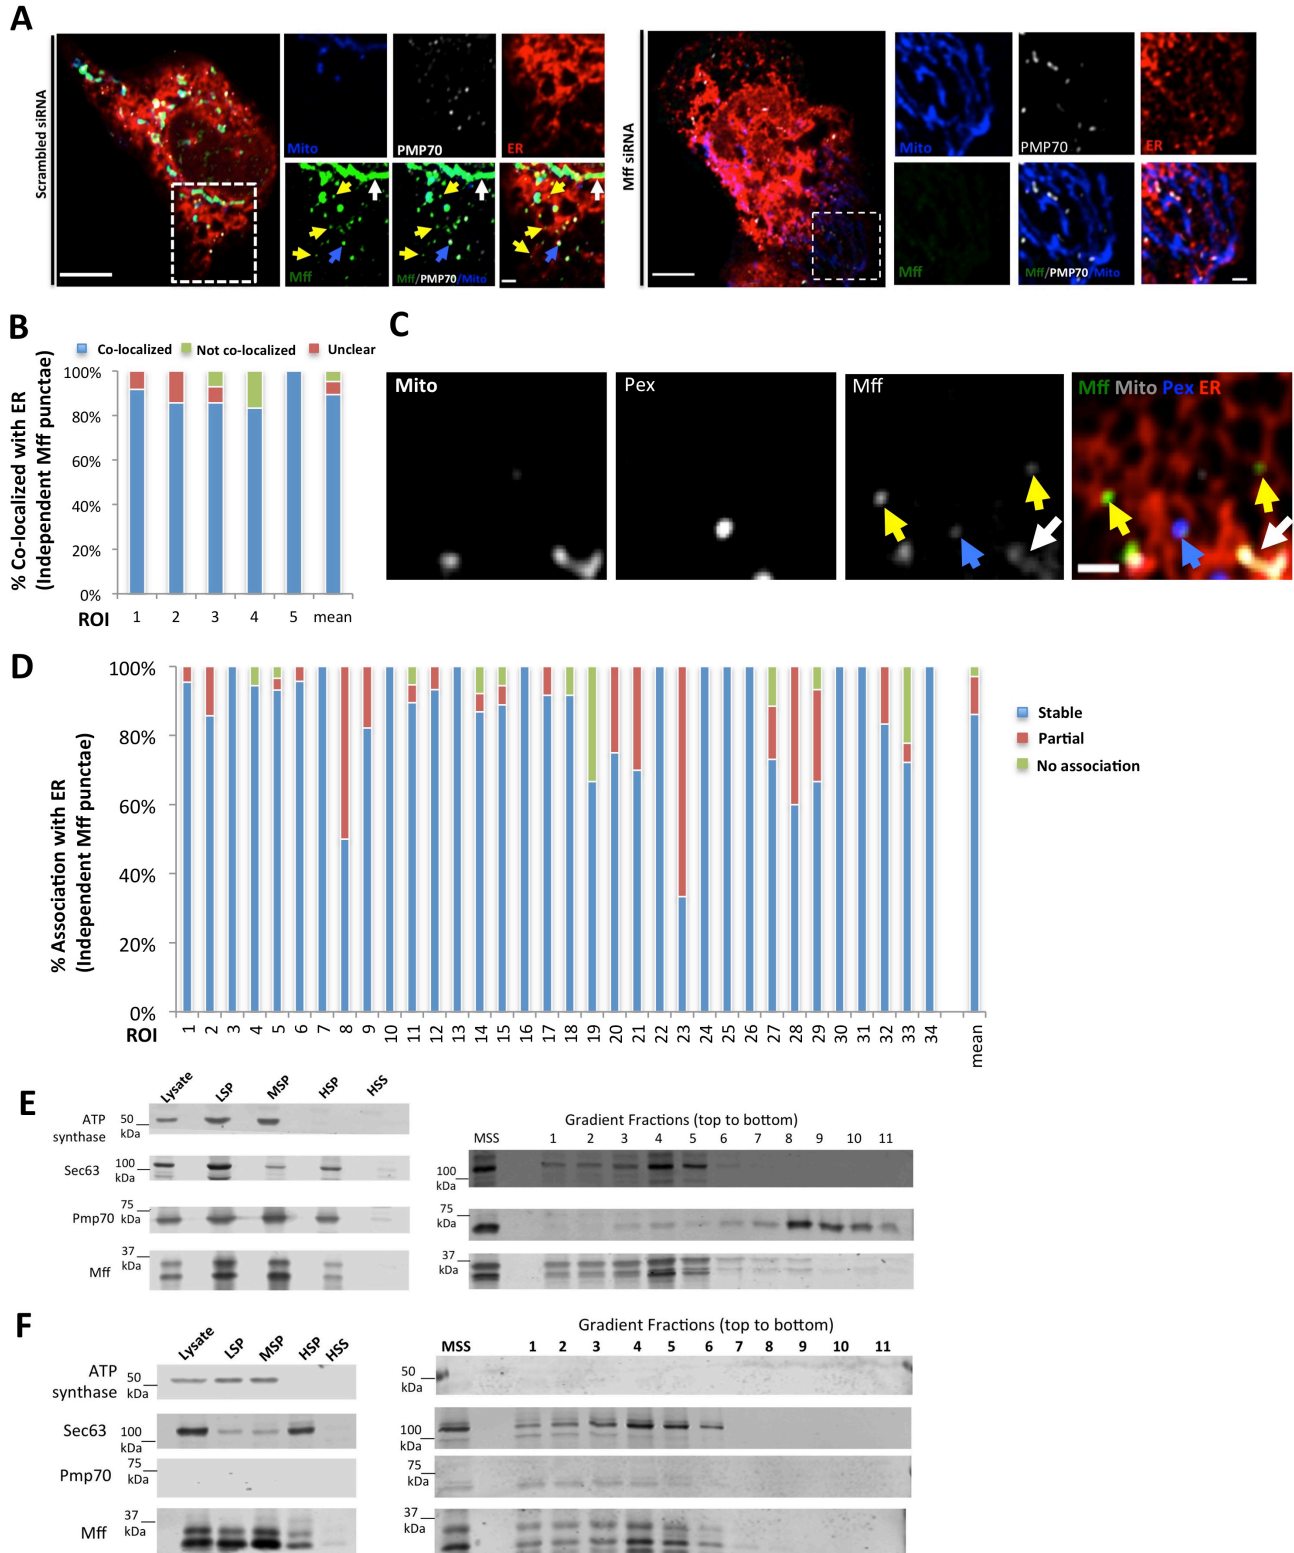

Figure 5

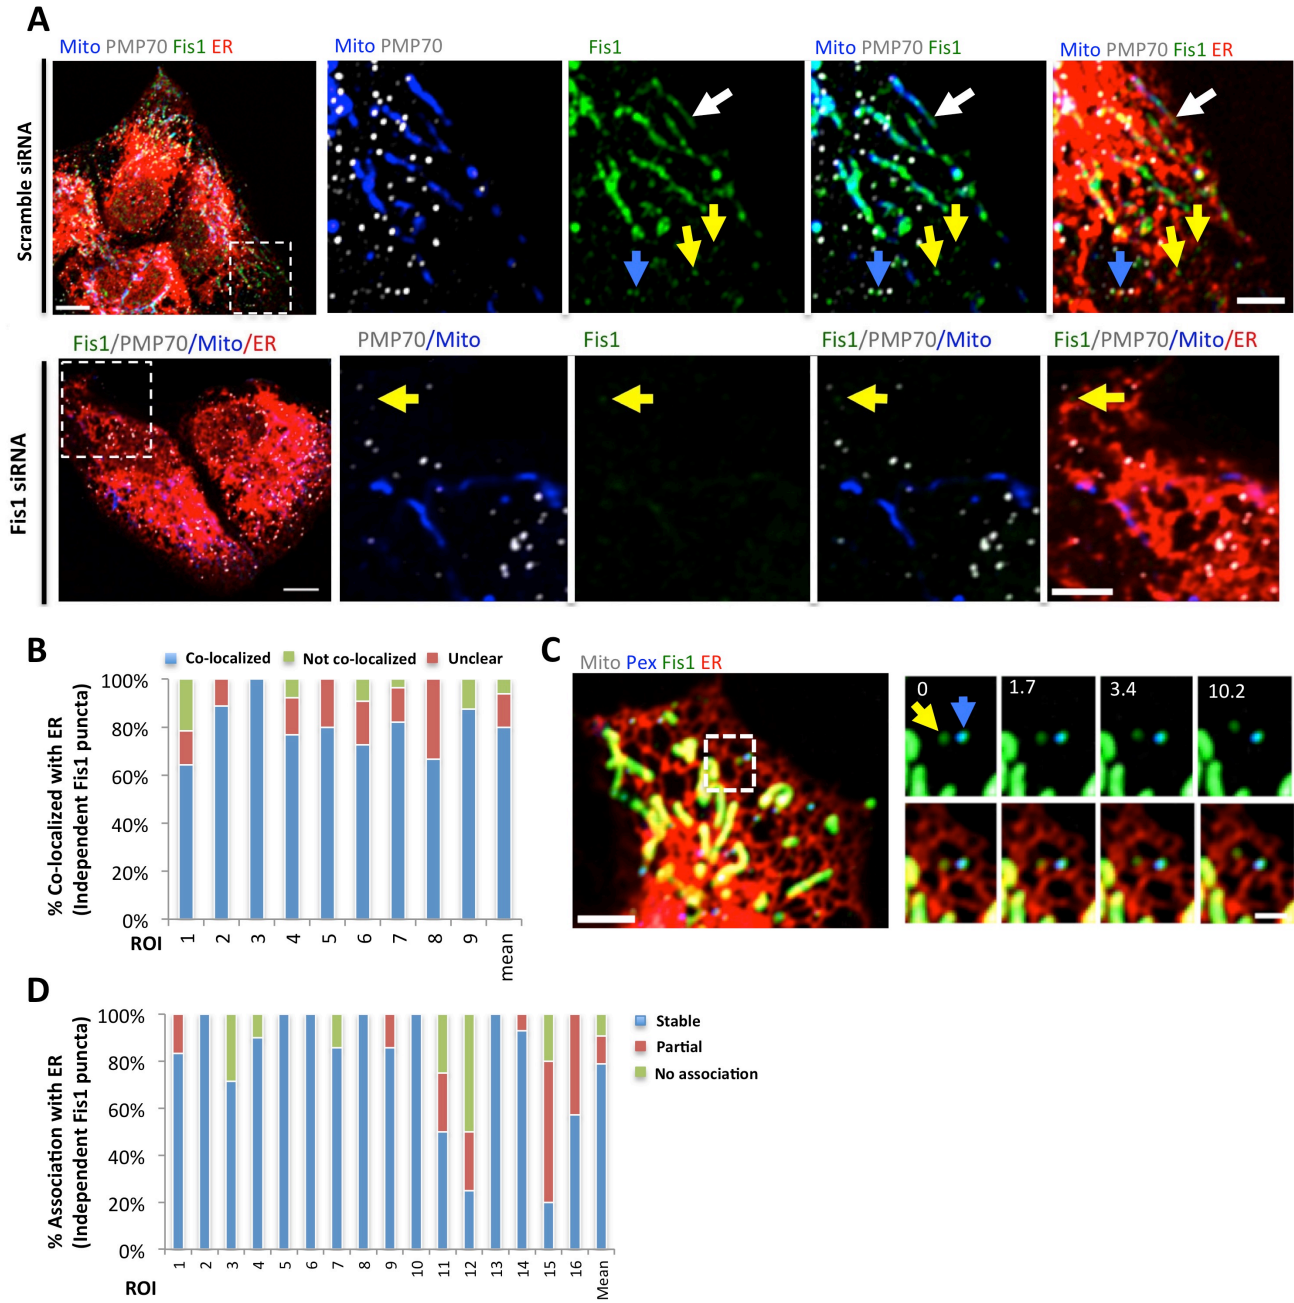

Figure 6

A

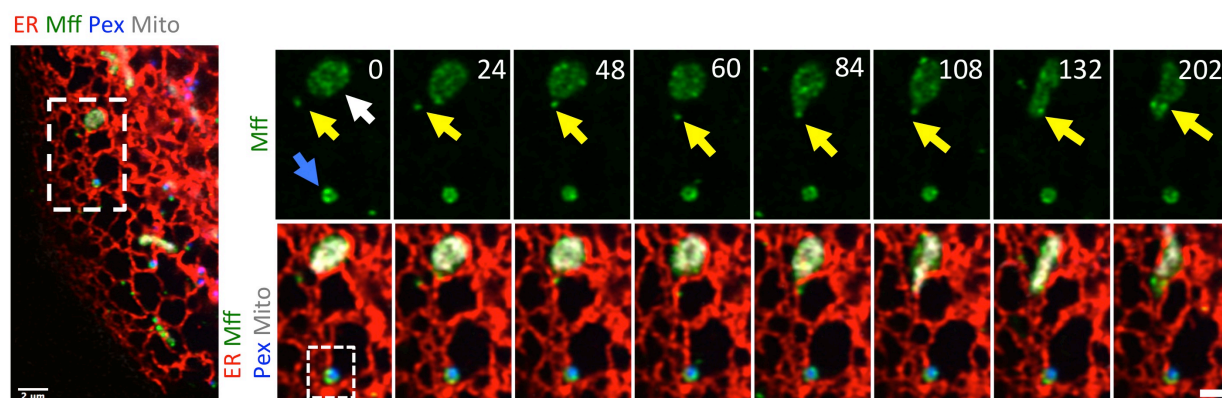

B

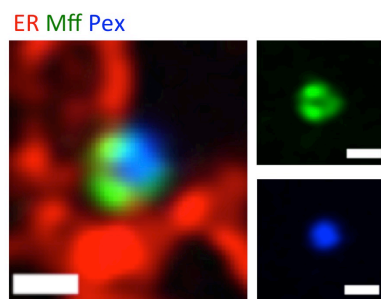

C

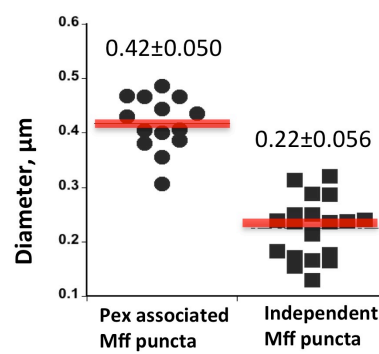

**A**

Mito Pex Drp1 Mff ER

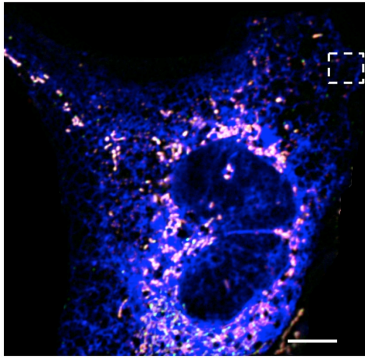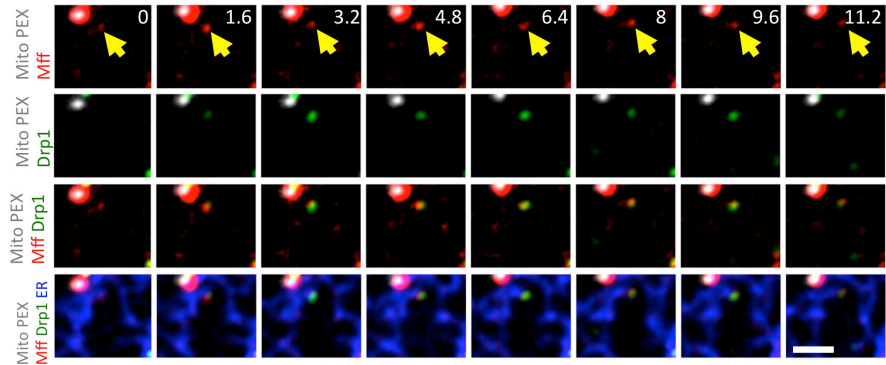

**B**

Mito Pex Mff

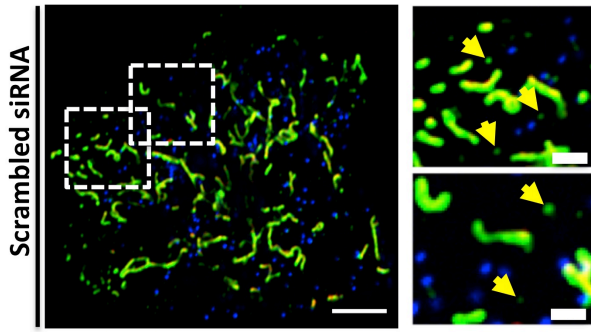

Mito Pex Mff

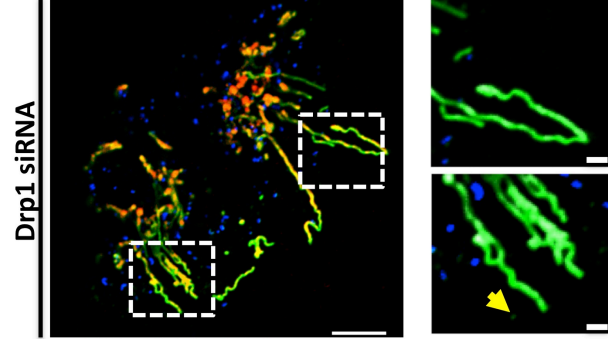

**C**

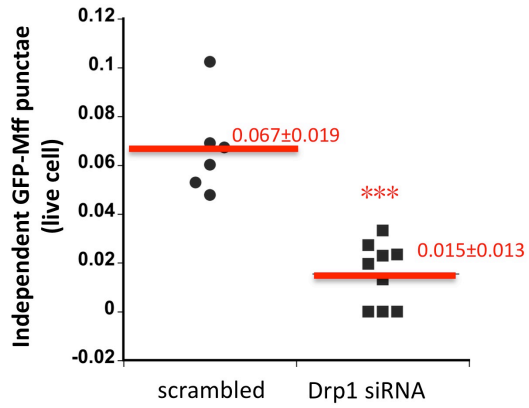

**D**

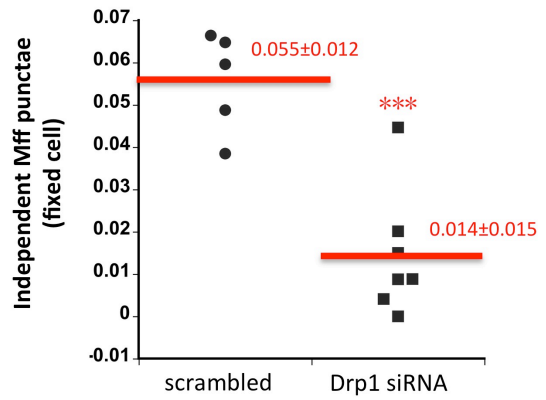



Figure 8

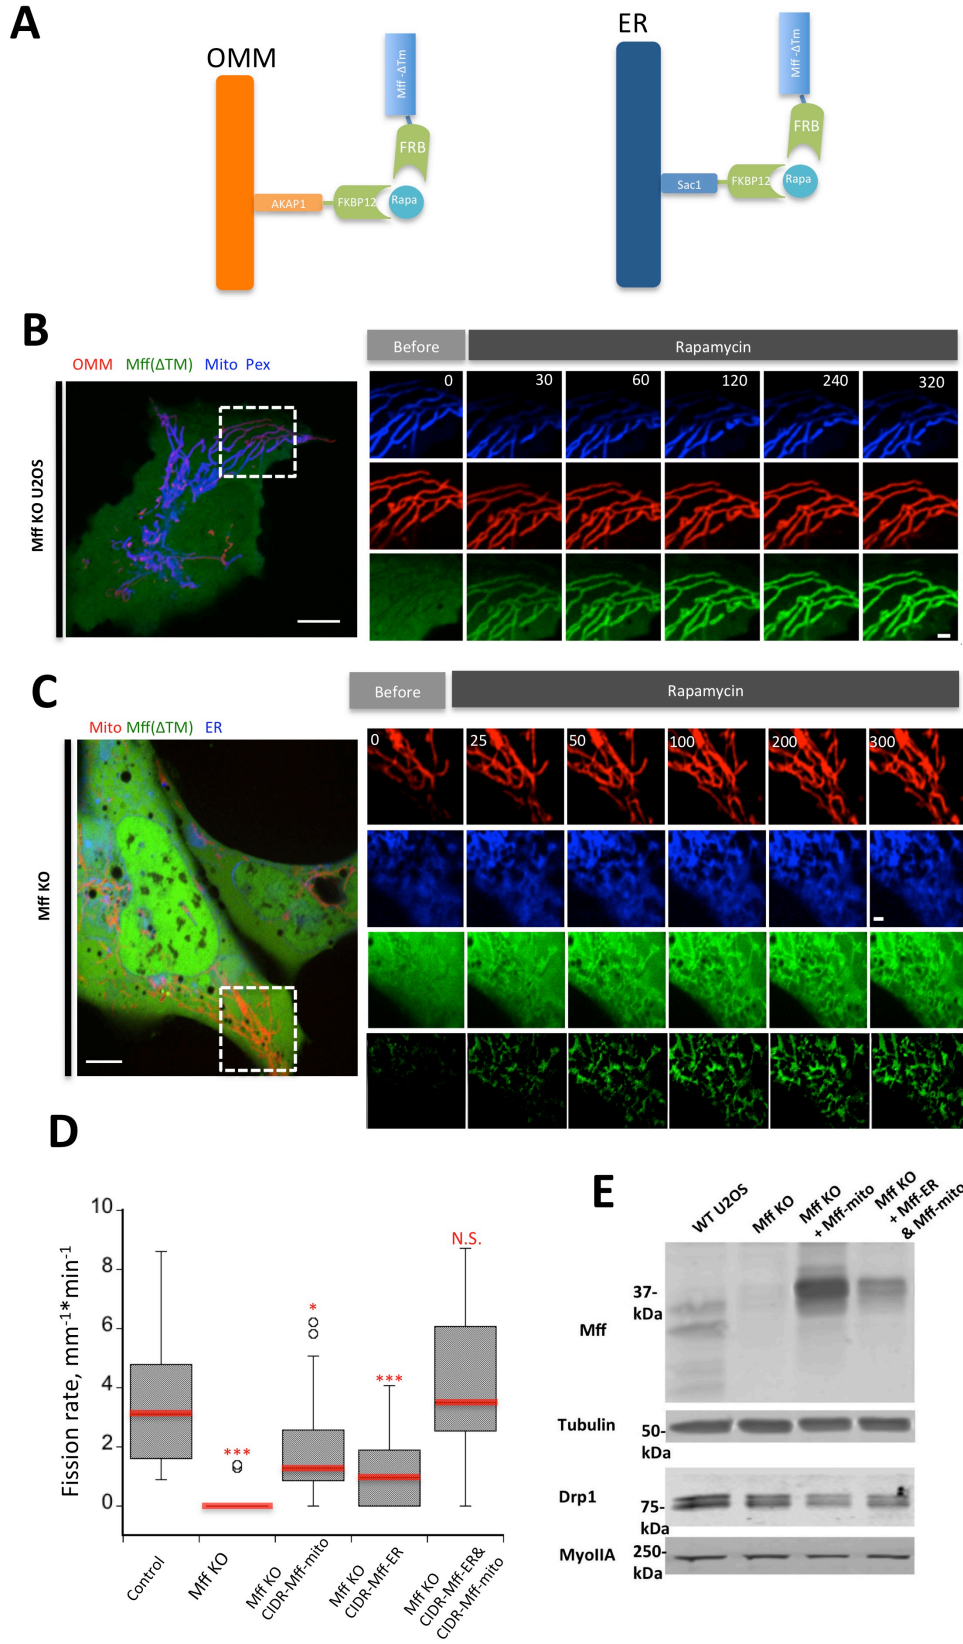



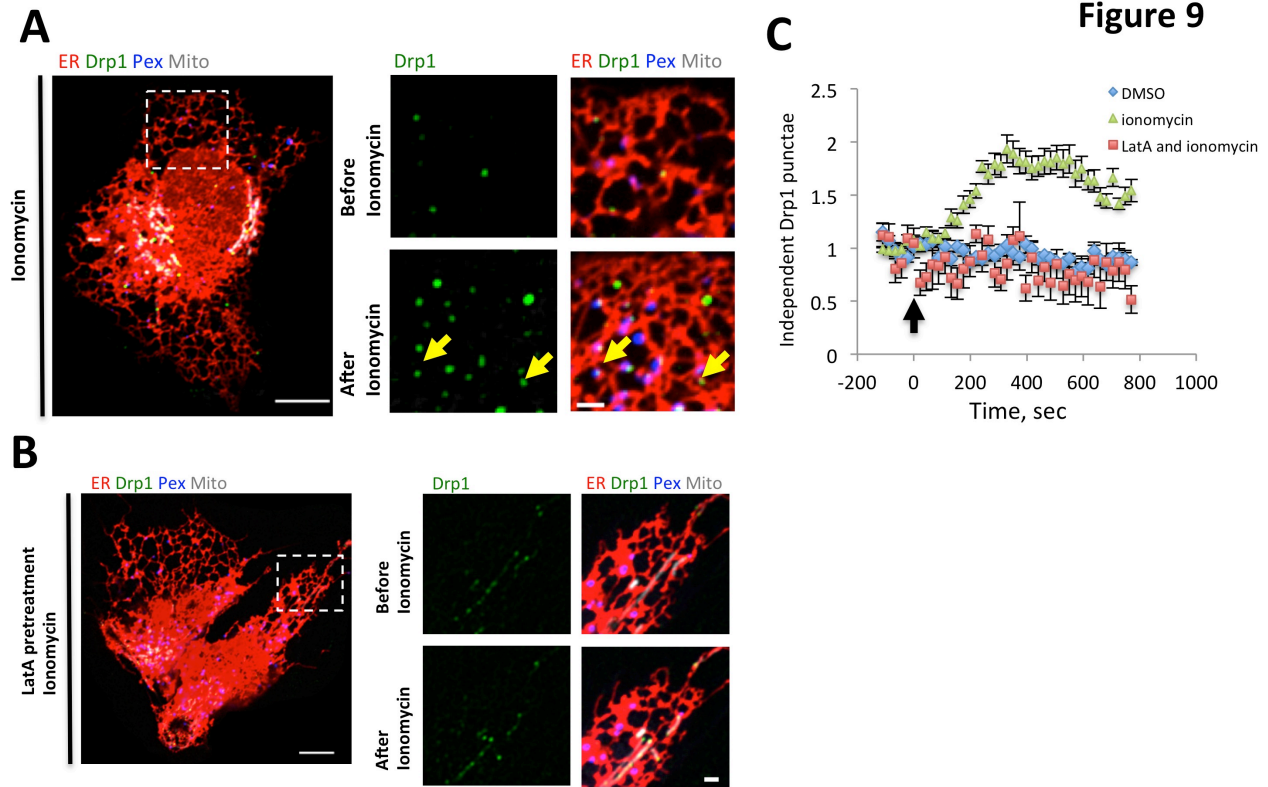

Figure 10

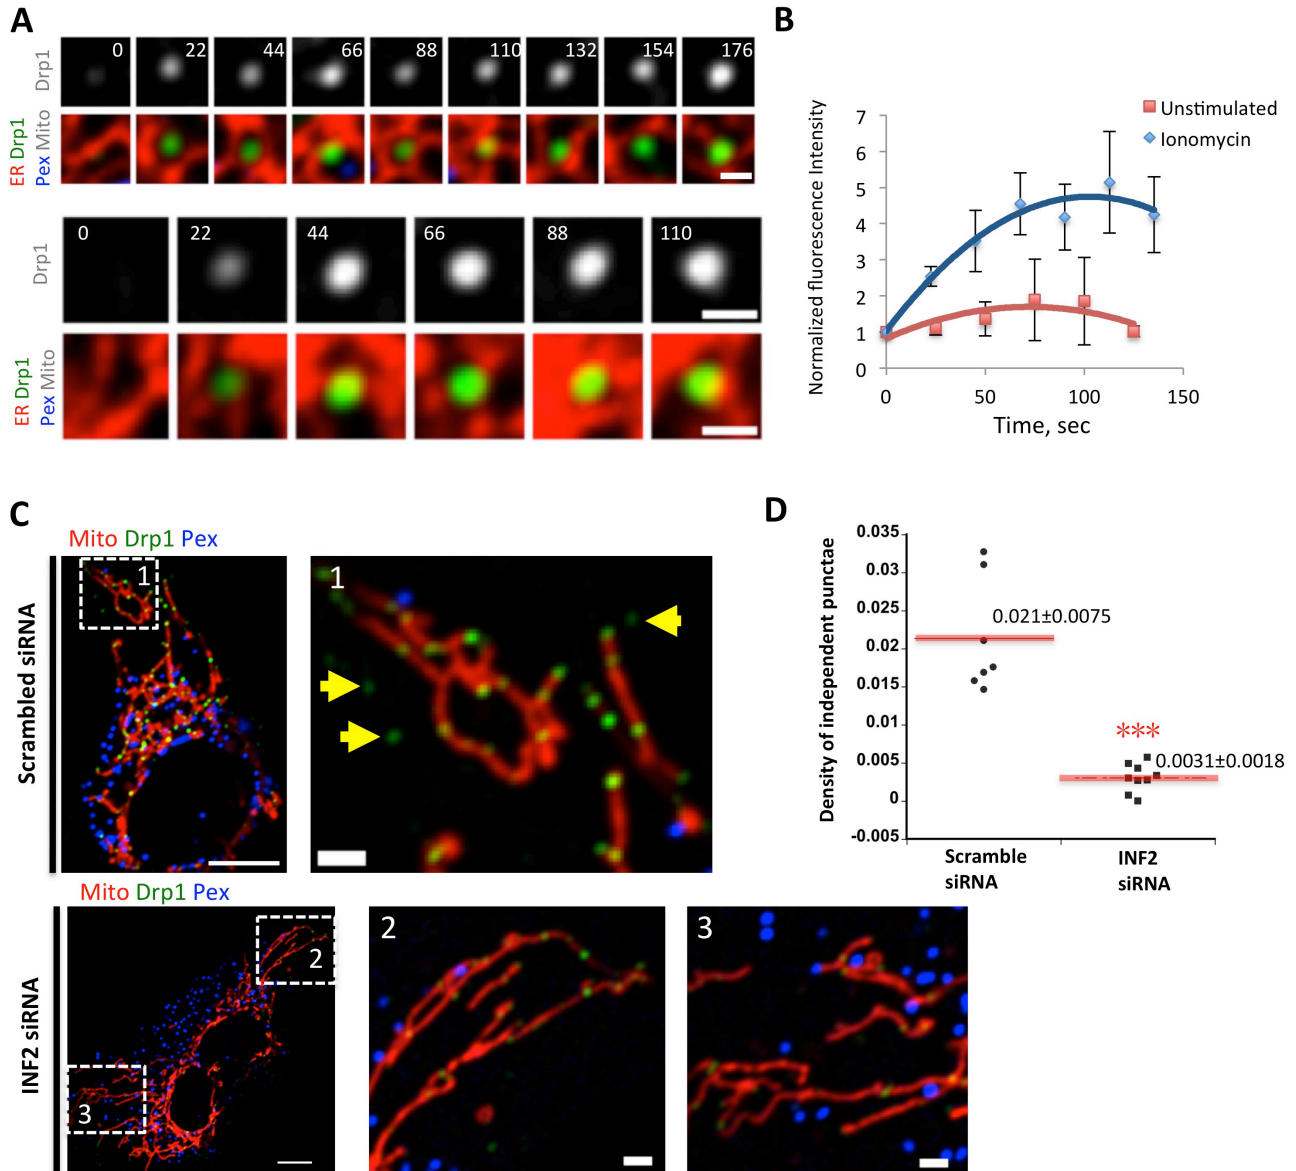

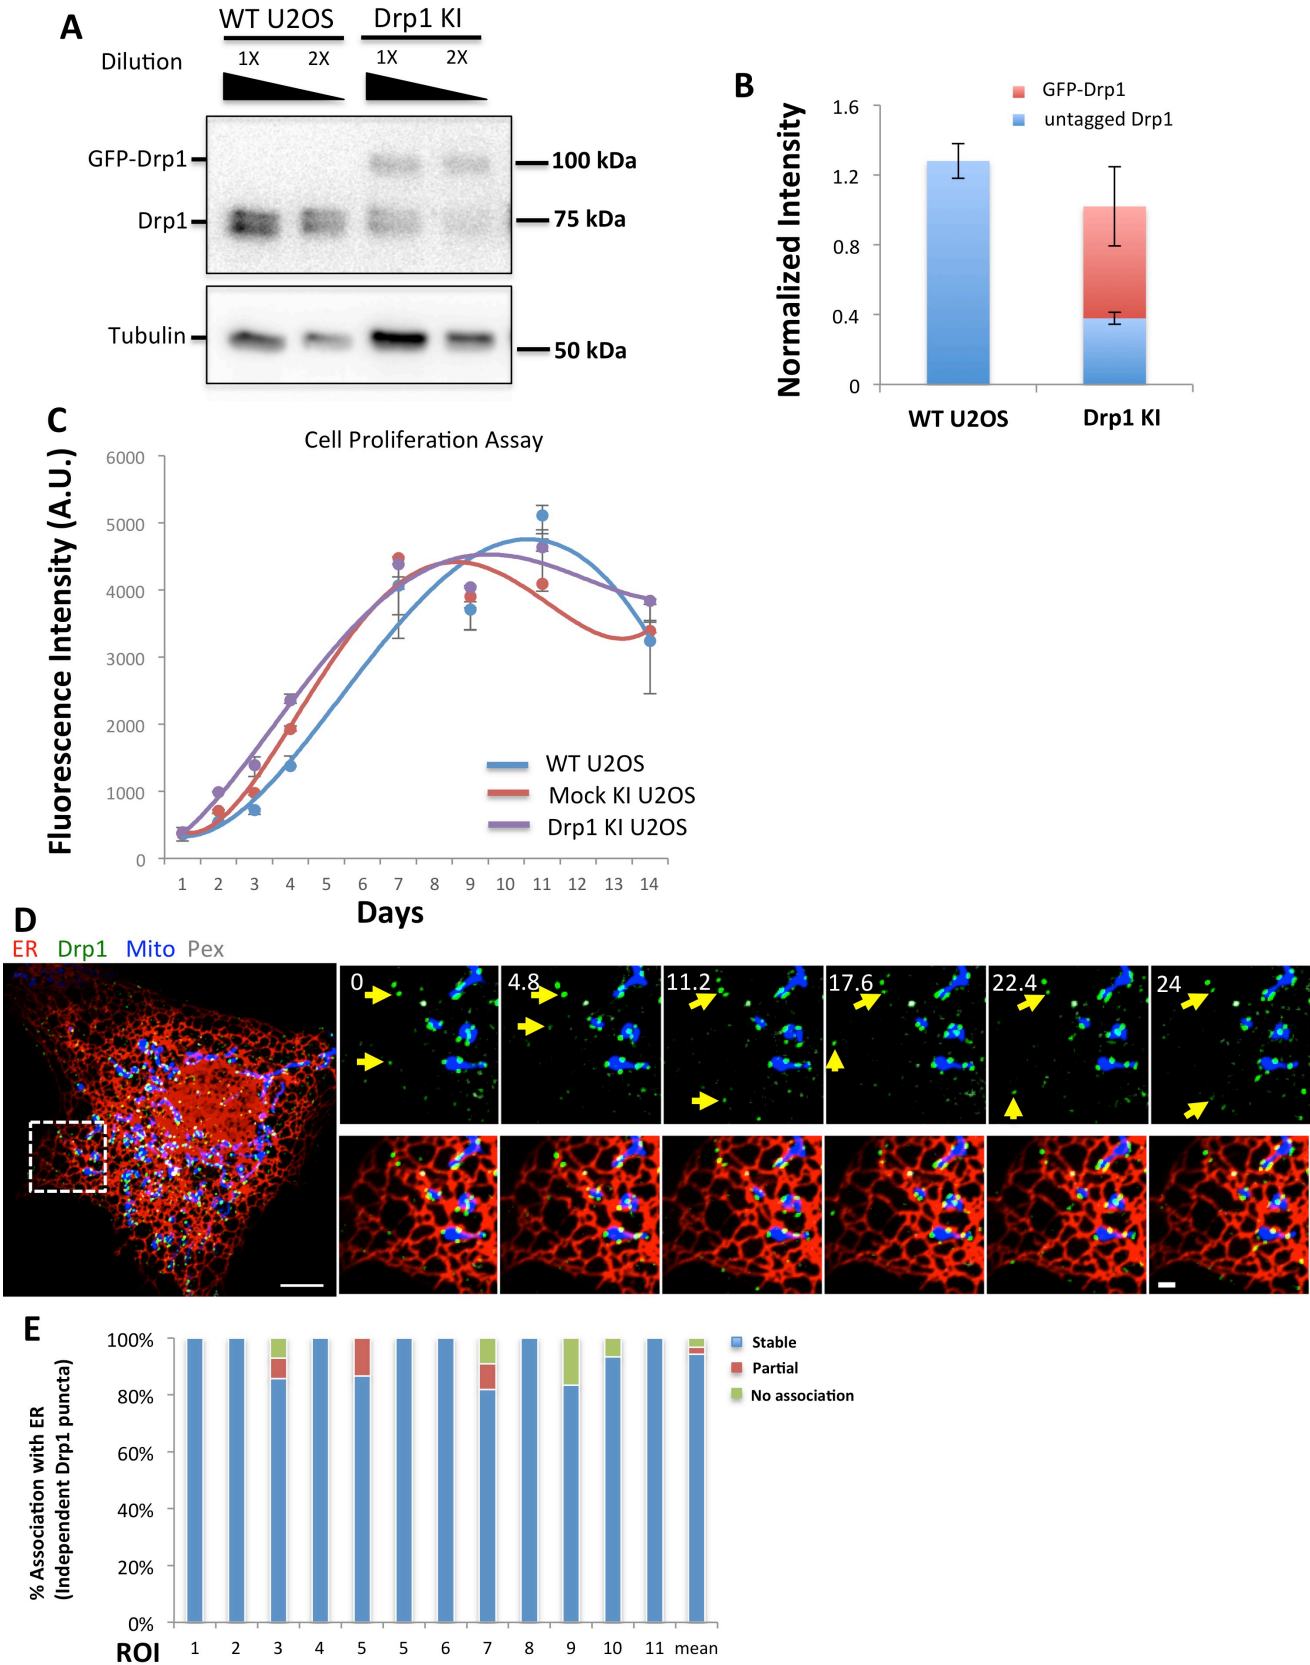

Figure S2

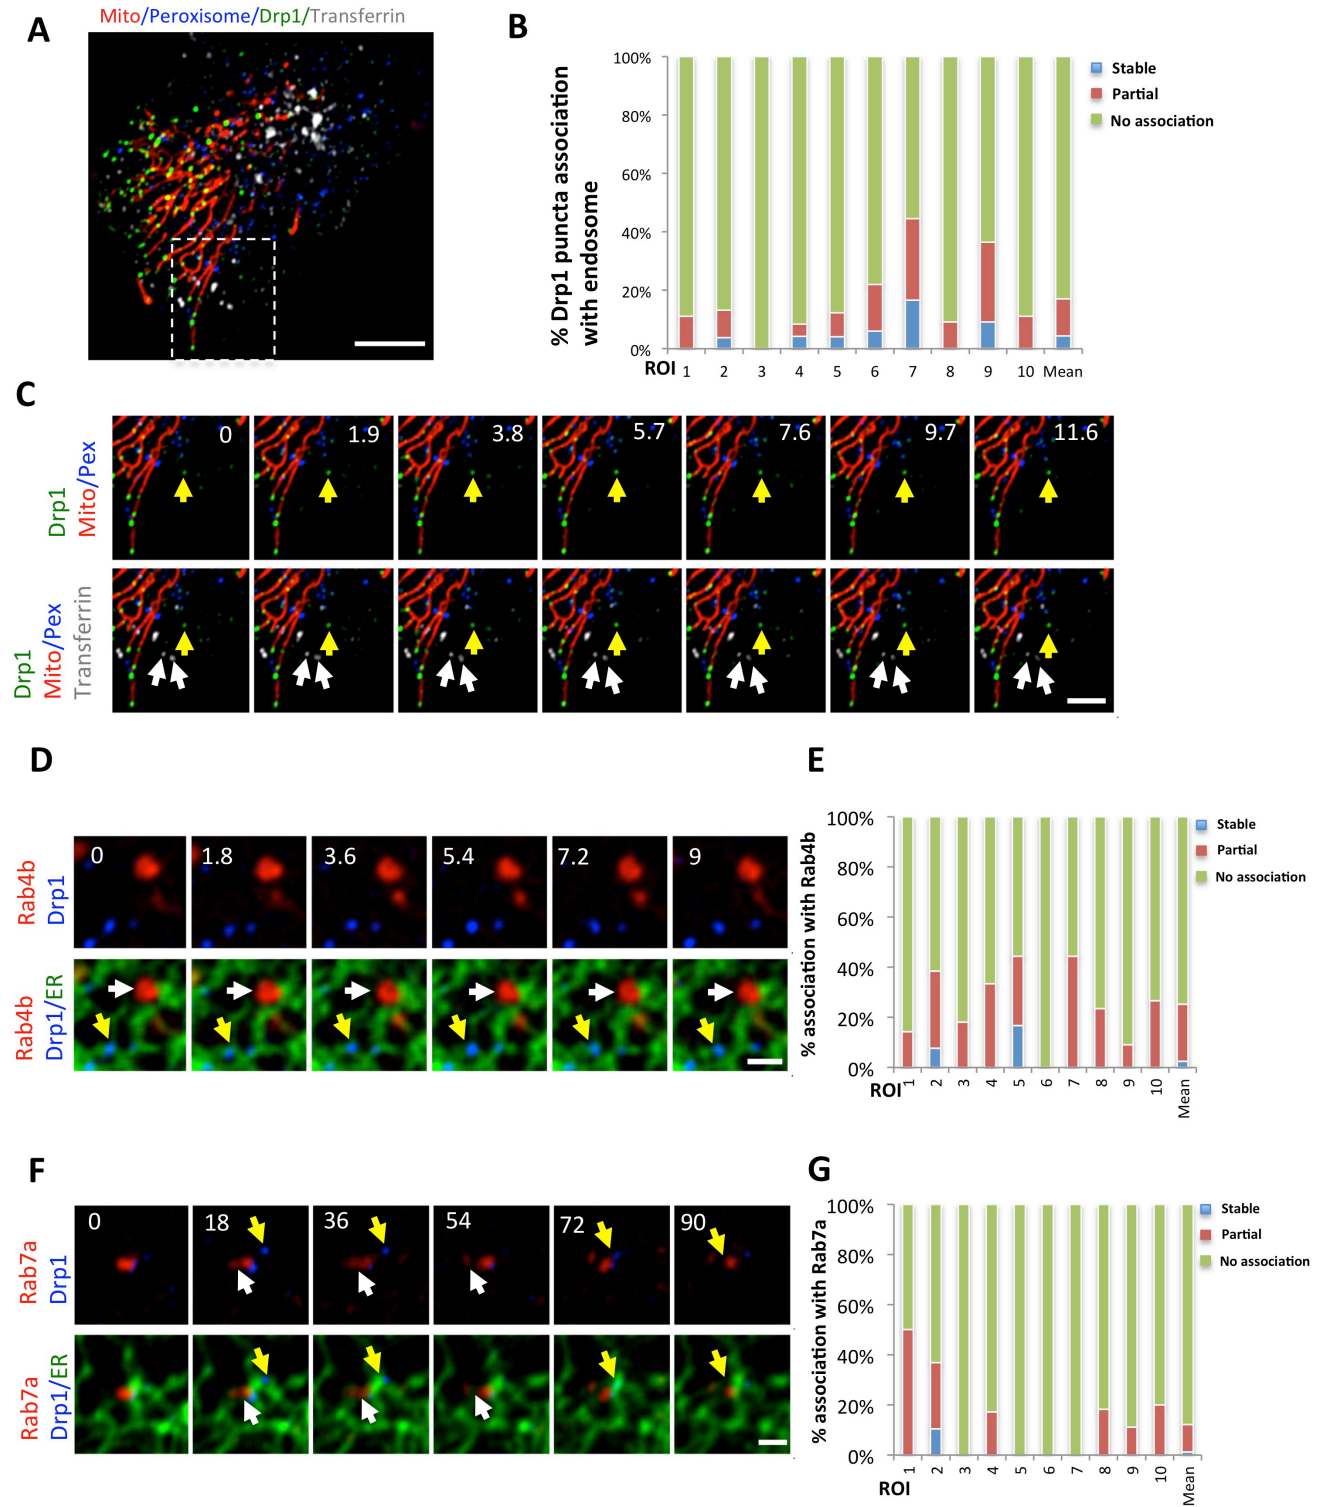

Figure S3

**A**

Tom20 Drp1 Pex

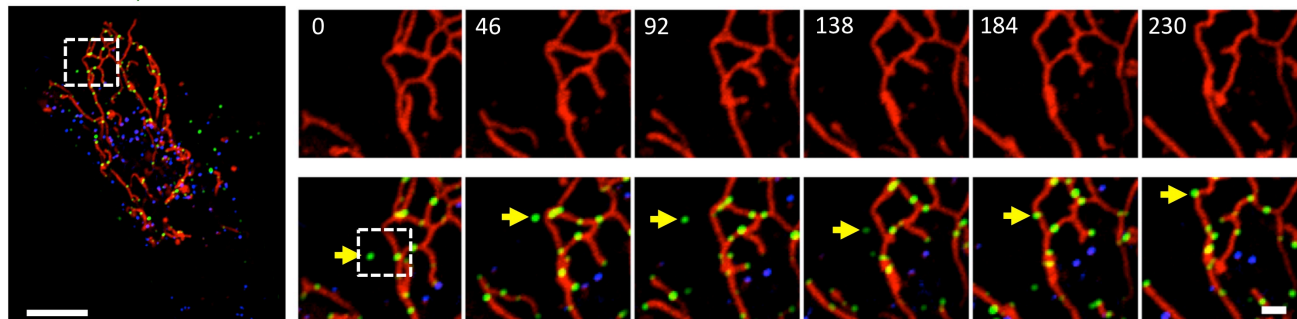

**B**

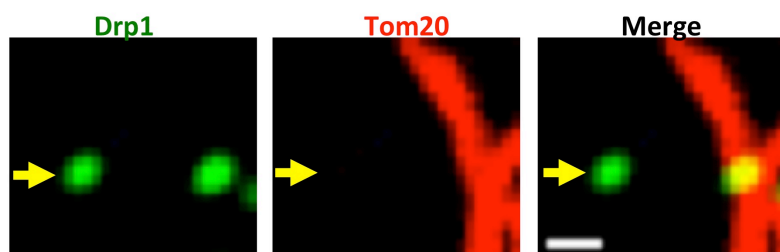

**C**

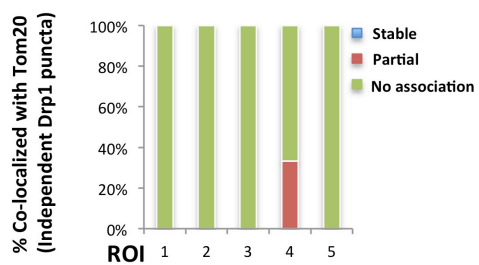



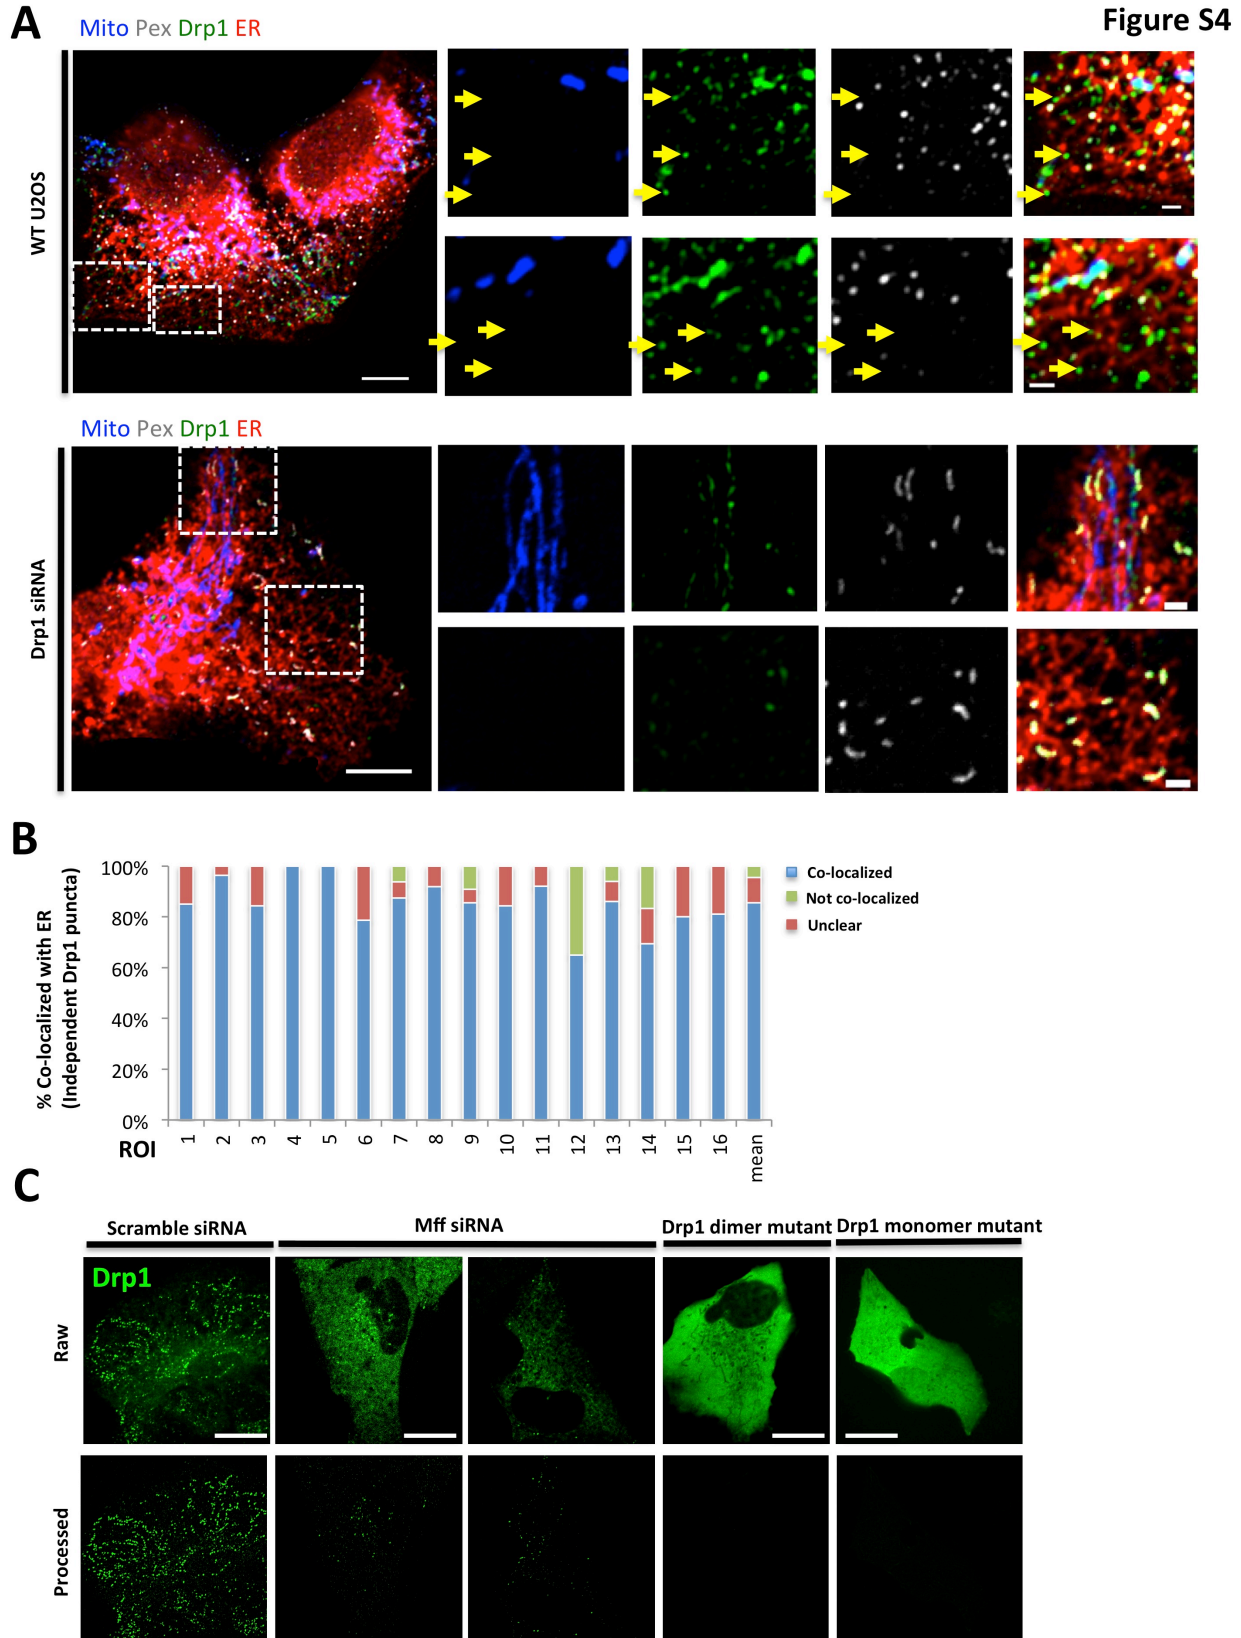

Figure S5

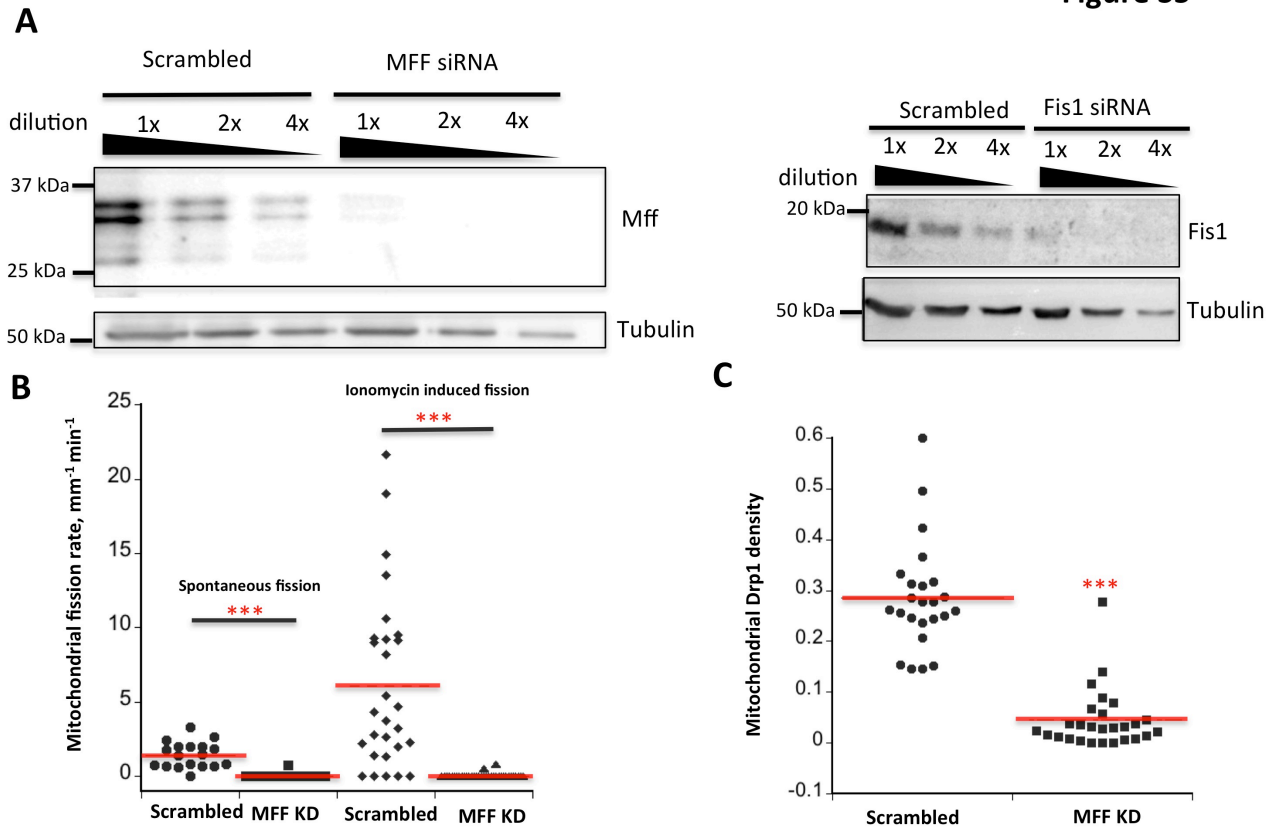

Figure S6

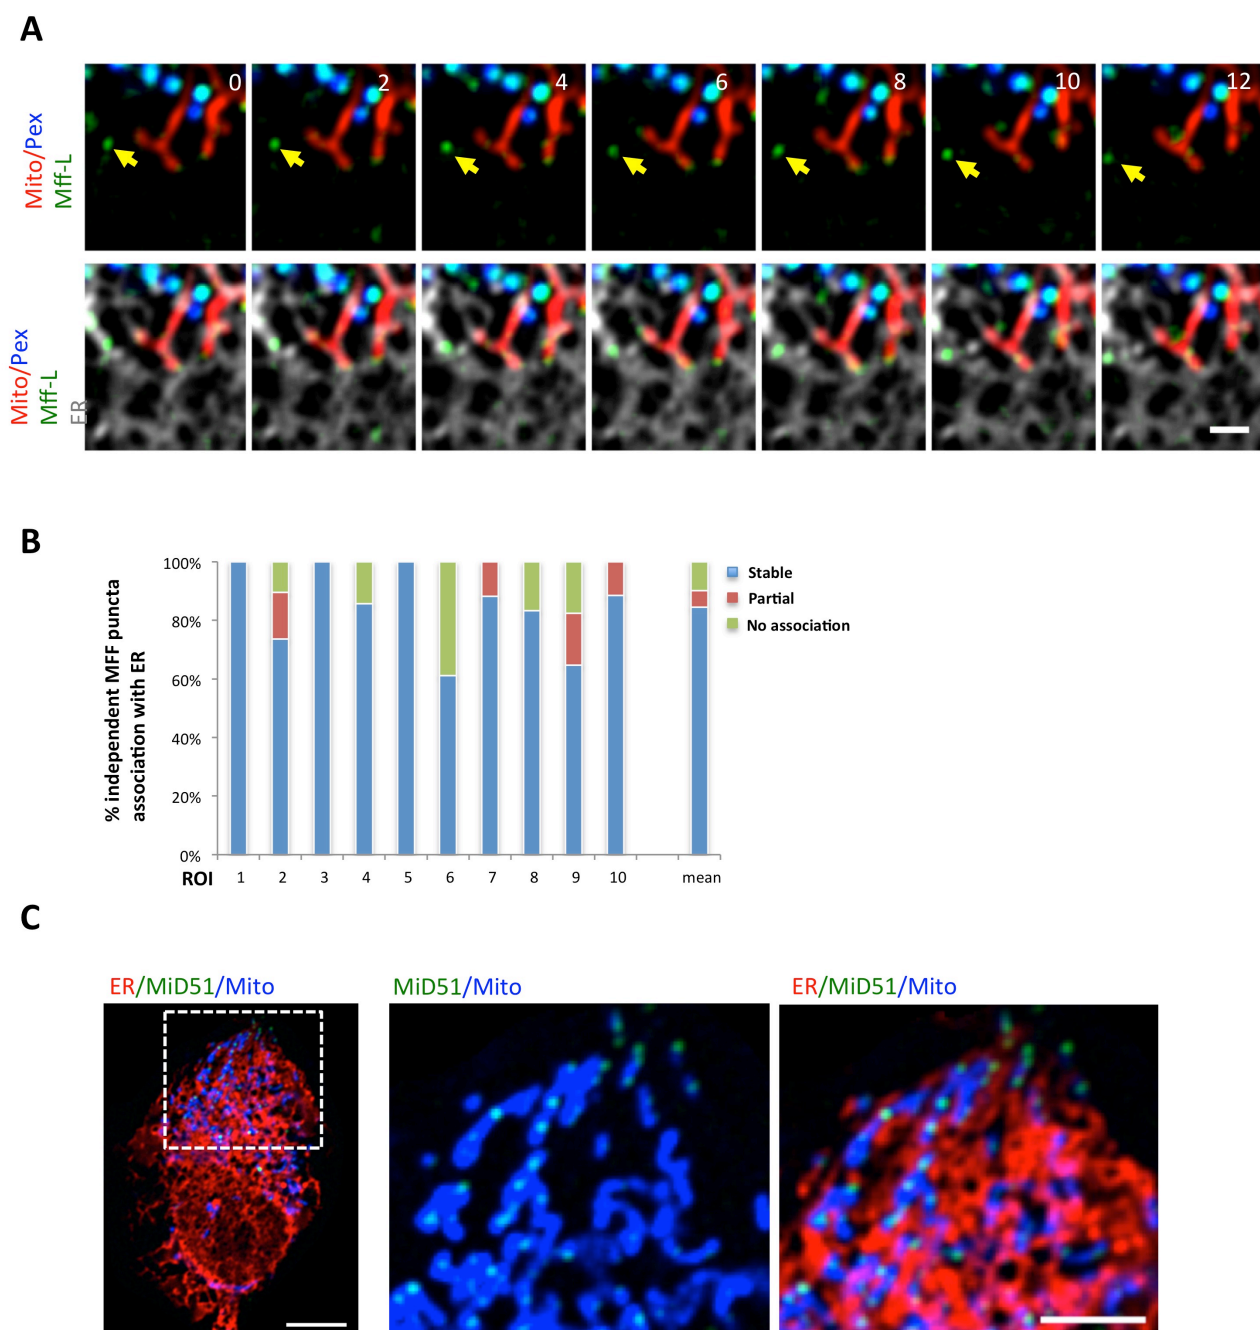

Source: https://www.biorxiv.org/content/10.1101/190538v1.full.pdf
